# Supplementary material
Source: PubMed Central journal article supplement (PMC2708725)
Supplement: 0811136106_0811136106SI.pdf [file 0811136106_0811136106SI.pdf]

# Supporting Information

Schuettpelez and Pryer 10.1073/pnas.0811136106

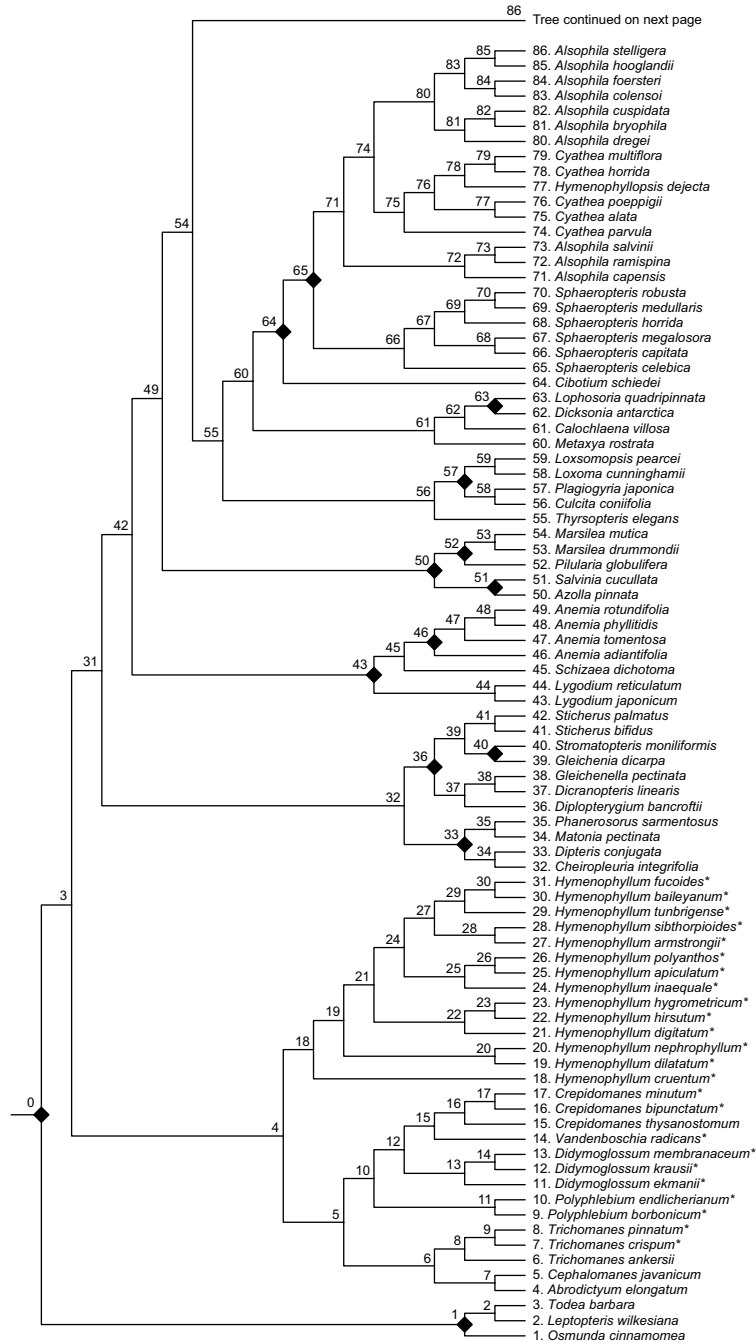

**Fig. S1.** Leptosporangiate fern phylogeny. Tree topology results from maximum likelihood analysis of 3 plastid genes sequenced for each of 400 leptosporangiate taxa (plus 5 eusporangiate outgroups, pruned here). Branch lengths and support values, as well as voucher information and GenBank accession numbers, are provided in Schuettpelez and Pryer [Schuettpelez E, Pryer KM (2007) Fern phylogeny inferred from 400 leptosporangiate species and 3 plastid genes. *Taxon* 56:1037–1050]. Taxon and node numbers correspond to those in Fig. 1; epiphytic species are indicated here with an asterisk following the species name. Nodes constrained by fossil ages are designated with black diamonds; justifications for these constraints appear in Table S2. Various node statistics are reported in Table S3.

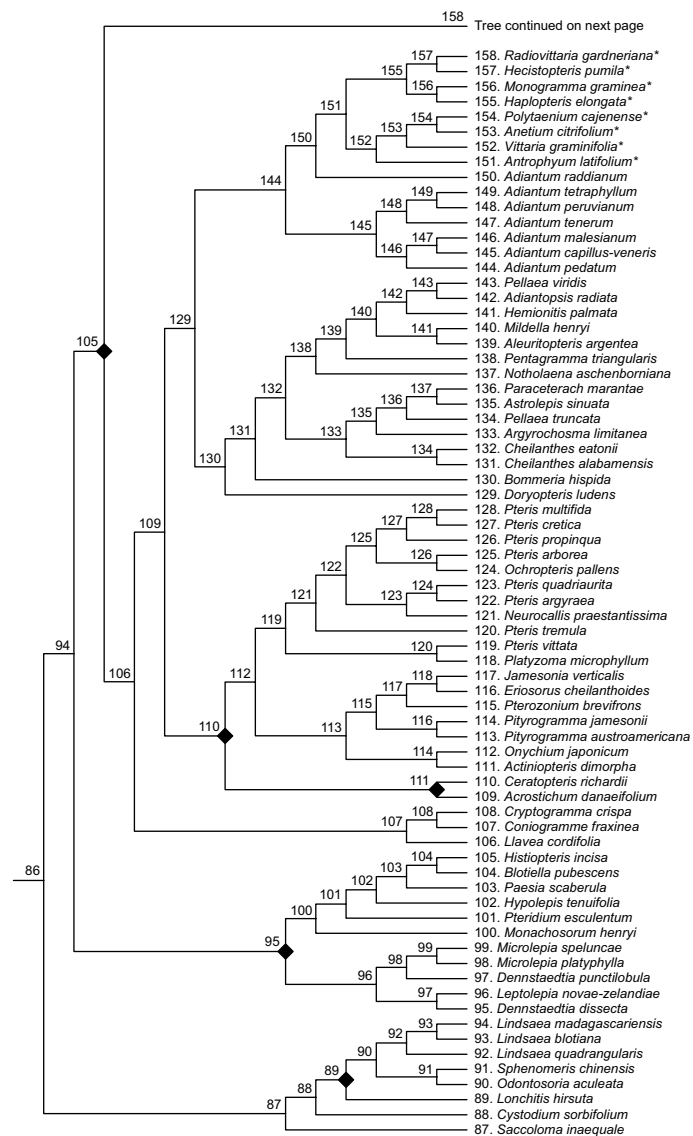

Fig. S1. Continued.

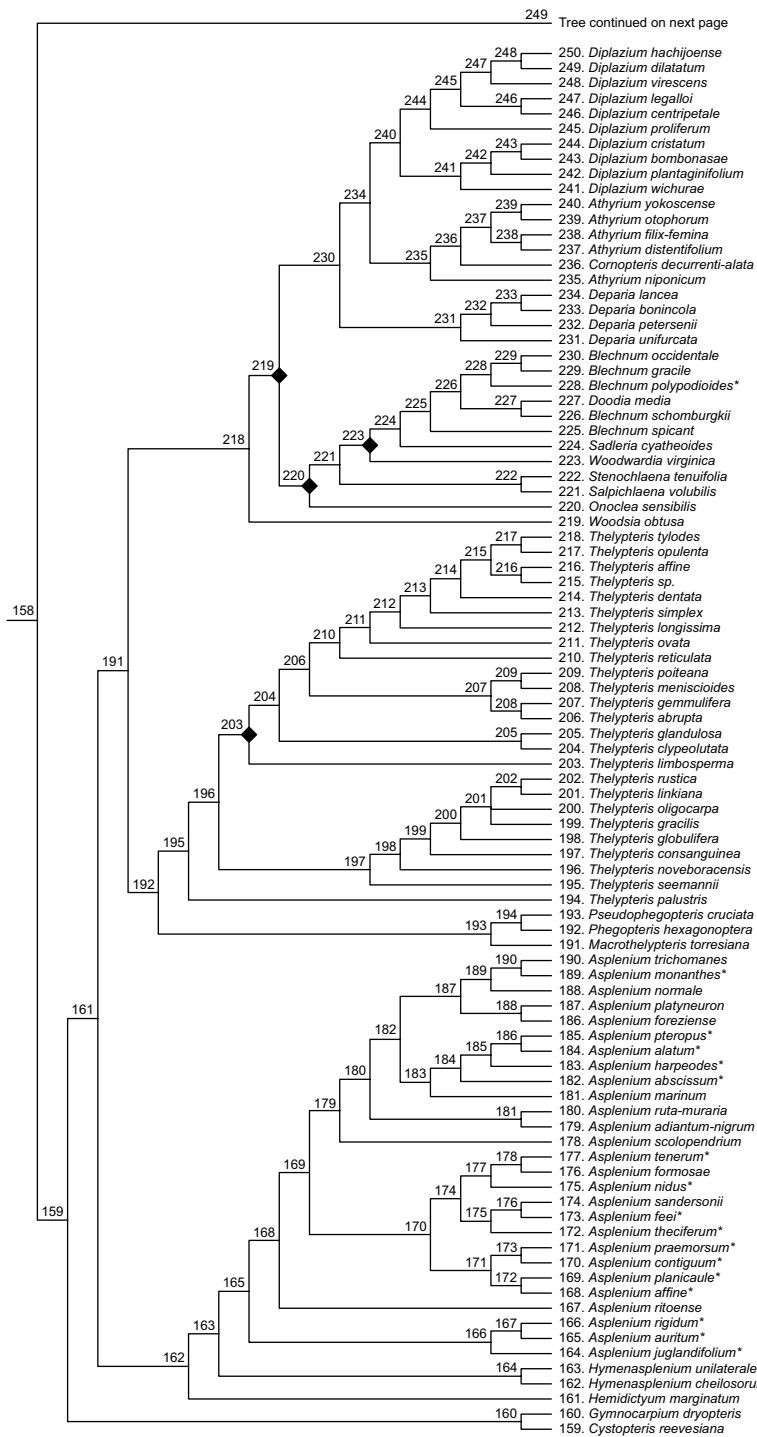

Fig. S1. Continued.

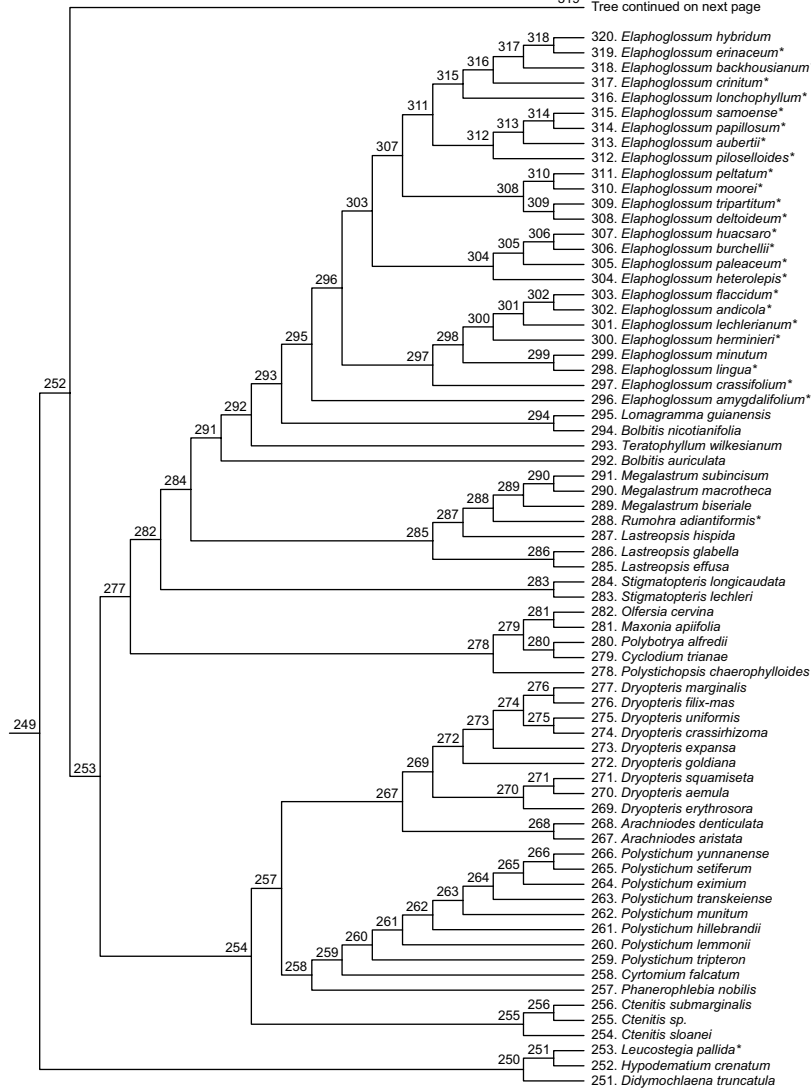

Fig. S1. Continued.

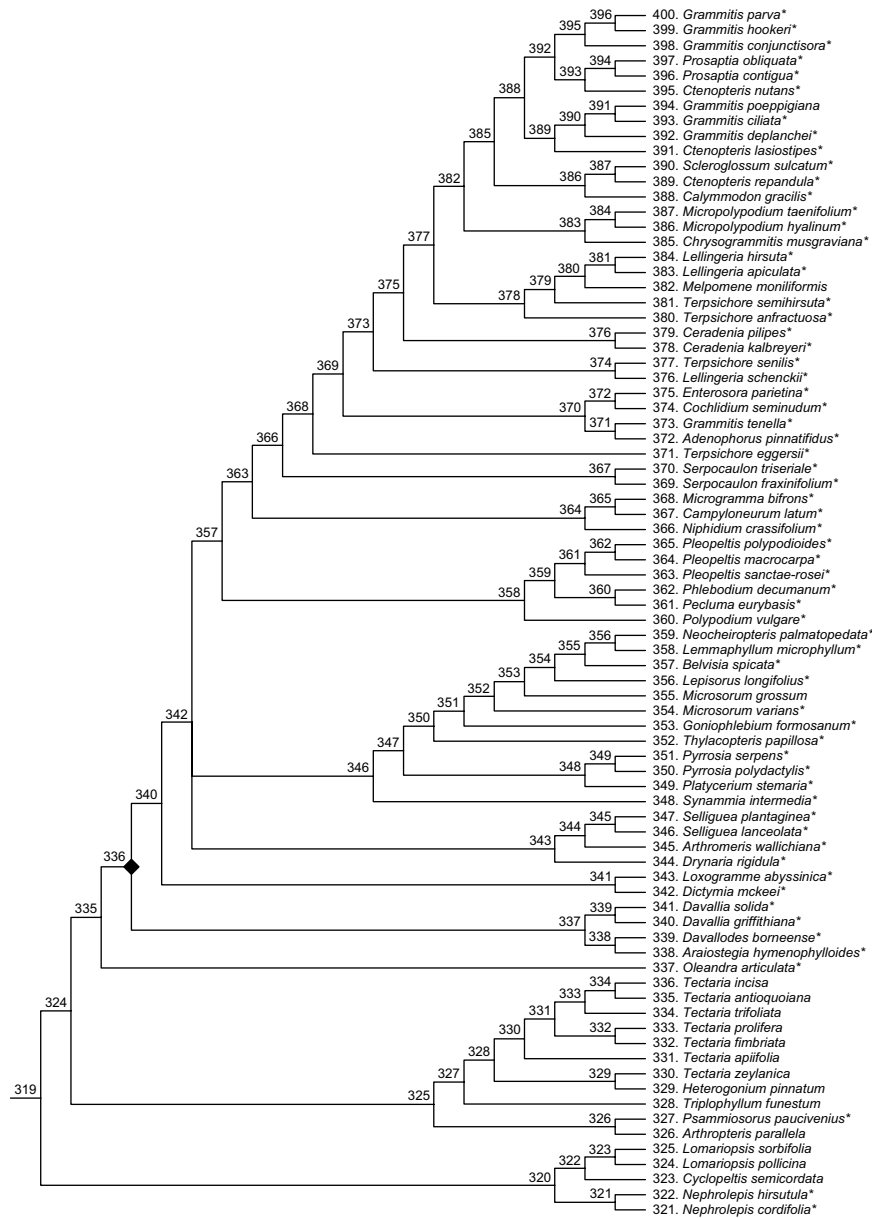

Fig. S1. Continued.

**Table S1. Contributions of major vascular plant lineages to overall and epiphytic diversity**

| Vascular plant lineage | Overall diversity |        | Epiphytic diversity |        |
|------------------------|-------------------|--------|---------------------|--------|
|                        | Species           | %      | Species             | %      |
| Lycopods               |                   |        |                     |        |
| Quillworts             | 150               | 0.06   | 0                   | 0.00   |
| Clubmosses             | 380               | 0.14   | 190                 | 0.69   |
| Spikemosses            | 700               | 0.26   | 5                   | 0.02   |
| Ferns                  |                   |        |                     |        |
| Whisk ferns            | 12                | 0.00   | 11                  | 0.04   |
| Horsetails             | 15                | 0.01   | 0                   | 0.00   |
| Ophioglossoid ferns    | 80                | 0.03   | 11                  | 0.04   |
| Marattioid ferns       | 150               | 0.06   | 0                   | 0.00   |
| Leptosporangiate ferns | 9,000             | 3.32   | 2,822               | 10.27  |
| Seed plants            |                   |        |                     |        |
| <i>Ginkgo</i>          | 1                 | 0.00   | 0                   | 0.00   |
| Gnetales               | 80                | 0.03   | 4                   | 0.01   |
| Cycads                 | 130               | 0.05   | 1                   | 0.00   |
| Conifers               | 600               | 0.22   | 0                   | 0.00   |
| Angiosperms            | 260,000           | 95.84  | 24,440              | 88.93  |
| Total                  | 271,298           | 100.00 | 27,483              | 100.00 |

Major lineages follow those of Pryer et al. (1). Overall species counts represent a relatively conservative consensus drawn from several sources (2–5). Epiphytic species counts are based on the overall species counts presented and within-lineage epiphyte percentages calculated from diversity estimates in Kress (6).

1. Pryer KM, et al. (2004) Phylogeny and evolution of ferns (monilophytes) with a focus on the early leptosporangiate divergences. *Am J Bot* 91:1582–1598.
2. Judd WS, Campbell CS, Kellogg EA, Stevens PF, Donoghue MJ (2002) *Plant Systematics: A Phylogenetic Approach, Second Edition* (Sinauer Associates, Sunderland).
3. Mabberley DJ (1997) *The Plant Book: A Portable Dictionary of the Vascular Plants* (Cambridge Univ Press, Cambridge).
4. Palmer JD, Soltis DE, Chase MW (2004) The plant tree of life: an overview and some points of view. *Am J Bot* 91:1437–1445.
5. Smith AR, et al. (2006) A classification for extant ferns. *Taxon* 55:705–731.
6. Kress WJ (1986) The systematic distribution of vascular epiphytes: an update. *Selbyana* 9:2–22.

Table S2. Fossil age constraints utilized in this study of epiphytic fern diversification

| Node | Age, Ma | Stem group assignment                                                          | Stratum         | Justification                                                                                                                                                                                                                                                                                                                                                                                                                                                                                                                                             |
|------|---------|--------------------------------------------------------------------------------|-----------------|-----------------------------------------------------------------------------------------------------------------------------------------------------------------------------------------------------------------------------------------------------------------------------------------------------------------------------------------------------------------------------------------------------------------------------------------------------------------------------------------------------------------------------------------------------------|
| 0    | = 299.0 | Osmundaceous ferns (taxa 1–3)                                                  | Permian         | The oldest osmundaceous fern fossils [e.g., <i>Grammatopteris</i> and <i>Rastropteris</i> (1–4)] are from the Permian. Representatives belonging to the clade that includes all other extant leptosporangiates [e.g., <i>Oligocarpia</i> and <i>Szea</i> (5)] also first appear in this stratum. Thus, it would seem that the earliest divergence among extant leptosporangiate ferns occurred near the Carboniferous/Permian boundary. The products of the Carboniferous leptosporangiate radiation (6–8) are not readily assignable to extant lineages. |
| 1    | ≥ 199.6 | <i>Osmunda</i> (taxon 1)                                                       | Upper Triassic  | <i>Osmunda</i> fossils have been described from the Upper Triassic (3), marking its divergence from the other osmundaceous fern genera.                                                                                                                                                                                                                                                                                                                                                                                                                   |
| 33   | ≥ 228.0 | Matoniaceae (taxa 34–35)                                                       | Middle Triassic | <i>Tomaniopteris</i> fossils assignable to the Matoniaceae are described from the Middle Triassic (9), marking the divergence between the Matoniaceae and Dipteridaceae.                                                                                                                                                                                                                                                                                                                                                                                  |
| 36   | ≥ 99.6  | Gleicheniaceae subclade (taxa 39–42)                                           | Albian          | A fossil <i>Gleichenia</i> (10) is definitively assignable to the clade consisting of <i>Gleichenia</i> , <i>Sticherus</i> , and <i>Stromatopteris</i> (today the genus <i>Gleichenia</i> is more narrowly defined).                                                                                                                                                                                                                                                                                                                                      |
| 40   | ≥ 89.3  | <i>Stromatopteris</i> (taxon 40)                                               | Turonian        | Two analyses of morphological data (10, 11) found the fossil genus <i>Boodlepteris</i> to be sister to the extant genus <i>Stromatopteris</i> .                                                                                                                                                                                                                                                                                                                                                                                                           |
| 43   | ≥ 167.7 | <i>Lygodium</i> (taxa 43–44)                                                   | Bajocian        | A sister group relationship has been demonstrated between the fossil <i>Stachypteris</i> (12) and the extant genus <i>Lygodium</i> (13).                                                                                                                                                                                                                                                                                                                                                                                                                  |
| 46   | ≥ 136.4 | <i>Anemia</i> subclade (taxa 47–49)                                            | Valanginian     | There is considerable evidence for the inclusion of the fossils <i>Pelletixia</i> and <i>Ruffordia</i> within the <i>Anemia</i> crown group (13–15), as sister to 1 of the 2 primary clades. Thus, these Lower Cretaceous fossils provide a minimum age for diversification within <i>Anemia</i> .                                                                                                                                                                                                                                                        |
| 50   | ≥ 140.2 | Marsileaceae (taxa 52–54)                                                      | Berriasian      | The fossil <i>Regnellites</i> [most conservatively from Berriasian strata (16)] is allied to Marsileaceae, and is therefore used to constrain the divergence of this family from the Salviniaceae.                                                                                                                                                                                                                                                                                                                                                        |
| 51   | ≥ 83.5  | <i>Azolla</i> (taxon 50)                                                       | Santonian       | Based on the presence of megaspore floats, the fossil <i>Glomerisporites</i> is assigned to the <i>Azolla</i> lineage, and marks the divergence between <i>Azolla</i> and <i>Salvinia</i> (17).                                                                                                                                                                                                                                                                                                                                                           |
| 52   | ≥ 83.5  | <i>Pilularia</i> (taxon 52)                                                    | Santonian       | The fossil <i>Regnellidium upatoensis</i> (18) is assignable to the extant genus <i>Regnellidium</i> [not sampled here, but sister to <i>Pilularia</i> (19)]. It is used here to constrain the divergence between <i>Pilularia</i> and <i>Marsilea</i> .                                                                                                                                                                                                                                                                                                  |
| 57   | ≥ 112.0 | Loxomataceae (taxa 58–59)                                                      | Aptian          | The fossil <i>Loxosomopteris</i> is considered to be a stem group member of the Loxomataceae (20).                                                                                                                                                                                                                                                                                                                                                                                                                                                        |
| 63   | ≥ 112.0 | <i>Lophosoria</i> (taxon 63)                                                   | Aptian          | The fossils <i>Lophosoria cupulatus</i> (21) and <i>Conantiopteris</i> (22) are allied to extant <i>Lophosoria</i> .                                                                                                                                                                                                                                                                                                                                                                                                                                      |
| 64   | ≥ 145.5 | Scaly tree ferns (taxa 65–86)                                                  | Upper Jurassic  | Species of <i>Cyathocaulis</i> [including Upper Jurassic <i>C. naktongensis</i> and <i>C. yabei</i> (23)] are stem members of the scaly tree fern clade (22), a position that is supported by the presence of a medullated dictyostele.                                                                                                                                                                                                                                                                                                                   |
| 65   | ≥ 93.5  | <i>Cyathea</i> / <i>Alsophila</i> clade (taxa 71–86)                           | Cenomanian      | Spores like those of the fossil <i>Kuylisporites</i> are found only in some species of <i>Cyathea</i> and <i>Alsophila</i> (24, 25), marking the divergence between these and the other scaly tree fern genus, <i>Sphaeropteris</i> .                                                                                                                                                                                                                                                                                                                     |
| 89   | ≥ 99.6  | Lindsaeoids (taxa 90–94)                                                       | Albian          | Based on root anatomy, an unnamed fossil is assignable to the lindsaeoids (26).                                                                                                                                                                                                                                                                                                                                                                                                                                                                           |
| 95   | ≥ 70.6  | <i>Dennstaedtia</i> / <i>Leptolepia</i> / <i>Microlepia</i> clade (taxa 95–99) | Campanian       | The fossil genus <i>Microlepiopsis</i> (27) is allied to this dennstaedtioid clade.                                                                                                                                                                                                                                                                                                                                                                                                                                                                       |
| 105  | ≥ 93.5  | Pteroids (taxa 106–158)                                                        | Cenomanian      | A fossil <i>Pteris</i> (28) is assignable to the Pteridaceae stem (not necessarily the extant genus <i>Pteris</i> ).                                                                                                                                                                                                                                                                                                                                                                                                                                      |
| 110  | ≥ 65.5  | <i>Ceratopteris</i> / <i>Acrostichum</i> clade (taxa 109–110)                  | Maastrichtian   | A fossil <i>Acrostichum</i> (29) is assignable to the <i>Ceratopteris</i> / <i>Acrostichum</i> clade (not necessarily the extant genus <i>Acrostichum</i> ).                                                                                                                                                                                                                                                                                                                                                                                              |
| 111  | ≥ 37.2  | <i>Ceratopteris</i> (taxon 110)                                                | Bartonian       | The fossil spore genus <i>Magnastriatites</i> , with a first occurrence in the Eocene, is allied to <i>Ceratopteris</i> (14).                                                                                                                                                                                                                                                                                                                                                                                                                             |
| 203  | ≥ 33.9  | Cyclosoroids (taxa 204–218)                                                    | Eocene          | <i>Cyclosorus</i> fossils from the Eocene are assignable to this large clade within the Thelypteridaceae (30, 31).                                                                                                                                                                                                                                                                                                                                                                                                                                        |
| 219  | ≥ 37.2  | Athyrioids (taxa 231–250)                                                      | Bartonian       | Based on anatomical features, the fossil genus <i>Makopteris</i> is assignable to the athyrioid clade (32).                                                                                                                                                                                                                                                                                                                                                                                                                                               |
| 220  | ≥ 55.8  | <i>Onoclea</i> (taxon 220)                                                     | Paleocene       | Nearly complete fossils assignable to <i>Onoclea sensibilis</i> (an extant species) have been recovered from the Paleocene (33).                                                                                                                                                                                                                                                                                                                                                                                                                          |

| Node | Age, Ma | Stem group assignment         | Stratum   | Justification                                                                                                                                             |
|------|---------|-------------------------------|-----------|-----------------------------------------------------------------------------------------------------------------------------------------------------------|
| 223  | ≥ 55.8  | <i>Woodwardia</i> (taxon 223) | Paleocene | Fossils assignable to <i>Woodwardia</i> are known from throughout the Tertiary, beginning in the Paleocene (31).                                          |
| 336  | ≥ 33.9  | Polygrammoids (taxa 342–400)  | Eocene    | The oldest fossil definitively assignable to the Polypodiaceae is <i>Protodrynaria</i> (34), marking the divergence of this family from the Davalliaceae. |

The 24 age constraints employed here were drawn primarily from 2 recent studies (35, 36), but were refined and augmented based on further evaluation; the current study, and these earlier studies, all relied heavily on detailed reviews of the fern fossil record (31, 37–40). The listed nodes (to which the 24 constraints were applied in our most likely phylogeny; see Fig. S1) were identified based on stem group assignments of fossils; ages reflect the strata from which these fossils were recovered. Fossils were almost always used to apply minimum-age constraints [corresponding to the upper boundary ages of the source strata (41)] to nodes subtending their phylogenetic positions [as identified using an apomorphy-based approach (36)]. However, for analytical reasons, the root (node 0; see Fig. S1) of the phylogeny was fixed (at the lower boundary of the stratum from which applicable fossils were recovered). Note that many fern fossils were not utilized as age constraints in this study, either because of uncertainty as to their phylogenetic position or redundancy in their application (e.g., if an older constraint was already applied to a more derived node).

- Galtier J, Wang SJ, Li CS, Hilton J (2001) A new genus of filicalean fern from the Lower Permian of China. *Bot J Linn Soc* 137:429–442.
- Miller CN (1971) Evolution of the fern family Osmundaceae based on anatomical studies. *Contrib Mus Paleontol Univ Mich* 28:105–169.
- Phipps CJ, et al. (1998) *Osmunda* (Osmundaceae) from the Triassic of Antarctica: an example of evolutionary stasis. *Am J Bot* 85:888–895.
- Röbber R, Galtier J (2002) First *Grammatopteris* tree ferns from the Southern Hemisphere—new insights in the evolution of the Osmundaceae from the Permian of Brazil. *Rev Palaeobot Palynol* 121:205–230.
- Yao Z, Taylor TN (1988) On a new gleicheniacean fern from the Permian of South China. *Rev Palaeobot Palynol* 54:121–134.
- Lovis JD (1977) Evolutionary patterns and processes in ferns. *Adv Bot Res* 4:229–415.
- Rothwell GW (1987) Complex Paleozoic Filicales in the evolutionary radiation of ferns. *Am J Bot* 74:458–461.
- Rothwell GW, Stockey RA (2008) in *Biology and Evolution of Ferns and Lycophytes*, eds Ranker TA, Haufler CH (Cambridge Univ Press, Cambridge), pp 332–366.
- Klavins SD, Taylor TN, Taylor EL (2004) Matoniacean ferns (Gleicheniales) from the Middle Triassic of Antarctica. *J Paleontol* 78:211–217.
- Herendeen PS, Skog JE (1998) *Gleichenia chaloneri*—a new fossil fern from the Lower Cretaceous (Albian) of England. *Int J Plant Sci* 159:870–879.
- Gandolfo MA, Nixon KC, Crepet WL, Ratcliffe GE (1997) A new fossil fern assignable to Gleicheniaceae from Late Cretaceous sediments of New Jersey. *Am J Bot* 84:483–493.
- Van Konijnenburg-van Cittert JHA (1981) Schizaeaceous spores in situ from the Jurassic of Yorkshire, England. *Rev Palaeobot Palynol* 33:169–181.
- Wikström N, Kenrick P, Vogel JC (2002) Schizaeaceae: a phylogenetic approach. *Rev Palaeobot Palynol* 119:35–50.
- Dettmann ME, Clifford T (1992) Phylogeny and biogeography of *Ruffordia*, *Mohria* and *Anemia* (Schizaeaceae) and *Ceratopteris* (Pteridaceae): evidence from in situ and dispersed spores. *Alcheringa* 16:269–314.
- Skog JE (1992) The Lower Cretaceous ferns in the genus *Anemia* (Schizaeaceae), Potomac Group of Virginia, and relationships within the genus. *Rev Palaeobot Palynol* 70:279–295.
- Yamada T, Kato M (2002) *Regnellites nagashimae* gen. et sp. nov., the oldest macrofossil of Marsileaceae, from the Upper Jurassic to Lower Cretaceous of Western Japan. *Int J Plant Sci* 163:715–722.
- Batten DJ, Collinson ME, Brain APR (1998) Ultrastructural interpretation of the Late Cretaceous megaspore *Glomerisporites pupus* and its associated microspores. *Am J Bot* 85:724–735.
- Lupia R, Schneider H, Moeser GM, Pryer KM, Crane PR (2000) Marsileaceae sporocarps and spores from the Late Cretaceous of Georgia, U.S.A. *Int J Plant Sci* 161:975–988.
- Pryer KM (1999) Phylogeny of marsileaceous ferns and relationships of the fossil *Hydropteris pinnata* reconsidered. *Int J Plant Sci* 160:931–954.
- Skog JE (1976) *Loxomopteris anasilla*, a new fossil fern rhizome from the Cretaceous of Maryland. *Am Fern J* 66:8–14.
- Cantrill DJ (1998) Early Cretaceous fern foliage from President Head, Snow Island, Antarctica. *Alcheringa* 22:241–258.
- Lantz TC, Rothwell GW, Stockey RA (1999) *Conantiopteris schuchmanii*, gen. et sp. nov., and the role of fossils in resolving the phylogeny of Cyatheaceae s.l. *J Plant Res* 112:361–381.
- Tidwell WD, Nishida H (1993) A new fossilized tree fern stem, *Nishidacaulis burgii* gen. et sp. nov., from Nebraska-South Dakota, USA. *Rev Palaeobot Palynol* 78:55–67.
- Gastony GJ, Tryon RM (1976) Spore morphology in the Cyatheaceae. II. The genera *Lophosoria*, *Metaxya*, *Sphaeropteris*, *Alsophila*, and *Nephelea*. *Am J Bot* 63:738–758.
- Mohr BAR, Lazarus DB (1994) Paleobiogeographic distribution of *Kuyllisporites* and its possible relationship to the extant fern genus *Cnemidaria* (Cyatheaceae). *Ann Mo Bot Gard* 81:758–767.
- Schneider H, Kenrick P (2001) The first record of lindsaeoid ferns (Lindsaeaceae, Polypodiidae) from the Lower Cretaceous of Wyoming (Aspen Shale, Albian). *Rev Palaeobot Palynol* 115:33–41.
- Serbet R, Rothwell GW (2003) Anatomically preserved ferns from the Late Cretaceous of western North America: Dennstaedtiaceae. *Int J Plant Sci* 164:1041–1051.
- Krassilov V, Bacchia F (2000) Cenomanian florule of Nammoura, Lebanon. *Cretac Res* 21:785–799.
- Bonde SD, Kumaran KPN (2002) The oldest macrofossil record of the mangrove fern *Acrostichum* L. from the Late Cretaceous Deccan Intertrappean beds of India. *Cretac Res* 23:149–152.
- Barthel M (1976) Ferns and Cycads. *Abh Zentr Geol Inst* 26:1–507 (in German).
- Collinson ME (2001) Cainozoic ferns and their distribution. *Brittonia* 53:172–235.
- Stockey RA, Nishida H, Rothwell GW (1999) Permineralized ferns from the Middle Eocene Princeton chert. I. *Makopteris princetonensis* gen. et sp. nov. (Athyraceae). *Int J Plant Sci* 160:1047–1055.
- Rothwell GW, Stockey RA (1991) *Onoclea sensibilis* in the Paleocene of North America, a dramatic example of structural and ecological stasis. *Rev Palaeobot Palynol* 70:113–124.
- Van Uffelen GA (1991) Fossil Polypodiaceae and their spores. *Blumea* 36:253–272.
- Pryer KM, et al. (2004) Phylogeny and evolution of ferns (monilophytes) with a focus on the early leptosporangiate divergences. *Am J Bot* 91:1582–1598.
- Schneider H, et al. (2004) Ferns diversified in the shadow of angiosperms. *Nature* 428:553–557.
- Collinson ME (1996) in *Pteridology in Perspective*, eds Camus JM, Gibby M, Johns RJ (Royal Botanic Gardens, Kew), pp 349–394.
- Skog JE (2001) Biogeography of Mesozoic leptosporangiate ferns related to extant ferns. *Brittonia* 53:236–269.
- Tidwell WD, Ash SR (1994) A review of selected Triassic to Early Cretaceous ferns. *J Plant Res* 107:417–442.
- Van Konijnenburg-van Cittert JHA (2002) Ecology of some Late Triassic to Early Cretaceous ferns in Eurasia. *Rev Palaeobot Palynol* 119:113–124.
- Gradstein FM, Ogg JG, Smith AG (2004) *A Geologic Time Scale* (Cambridge Univ Press, Cambridge).



Table S3. Age, diversification rate, and other statistics for all resolved leptosporangiate nodes

| Node | Best age, Ma | Reconstructed habit     |           |             | Species            |         | Estimated diversification rate,<br>net speciation events per<br>million years |                          |
|------|--------------|-------------------------|-----------|-------------|--------------------|---------|-------------------------------------------------------------------------------|--------------------------|
|      |              | Proportional likelihood |           |             | Estimated<br>total | Sampled | Extinction<br>rate = 0.0                                                      | Extinction<br>rate = 0.9 |
|      |              | Terrestrial             | Epiphytic | Decision    |                    |         |                                                                               |                          |
| 0    | 299.0        | 0.9651                  | 0.0349    | Terrestrial | 9,000              | 400     | 0.0281                                                                        | 0.0226                   |
| 1    | 199.6        | 0.9702                  | 0.0298    | Terrestrial | 68                 | 3       | 0.0176                                                                        | 0.0099                   |
| 2    | 75.4         | 0.9913                  | 0.0087    | Terrestrial | 45                 | 2       | 0.0413                                                                        | 0.0217                   |
| 3    | 280.1        | 0.9691                  | 0.0309    | Terrestrial | 8,933              | 397     | 0.0300                                                                        | 0.0241                   |
| 4    | 185.1        | 0.1017                  | 0.8983    | Epiphytic   | 630                | 28      | 0.0311                                                                        | 0.0222                   |
| 5    | 147.3        | 0.0381                  | 0.9619    | Epiphytic   | 315                | 14      | 0.0344                                                                        | 0.0233                   |
| 6    | 135.1        | 0.0864                  | 0.9136    | Epiphytic   | 113                | 5       | 0.0298                                                                        | 0.0181                   |
| 7    | 112.5        | 0.4620                  | 0.5380    | Ambiguous   | 45                 | 2       | 0.0277                                                                        | 0.0145                   |
| 8    | 94.8         | 0.0954                  | 0.9046    | Epiphytic   | 68                 | 3       | 0.0371                                                                        | 0.0209                   |
| 9    | 45.0         | 0.0045                  | 0.9955    | Epiphytic   | 45                 | 2       | 0.0692                                                                        | 0.0363                   |
| 10   | 131.7        | 0.0014                  | 0.9986    | Epiphytic   | 203                | 9       | 0.0351                                                                        | 0.0228                   |
| 11   | 42.6         | 0.0007                  | 0.9993    | Epiphytic   | 45                 | 2       | 0.0731                                                                        | 0.0384                   |
| 12   | 127.3        | 0.0003                  | 0.9997    | Epiphytic   | 158                | 7       | 0.0343                                                                        | 0.0217                   |
| 13   | 89.7         | 0.0004                  | 0.9996    | Epiphytic   | 68                 | 3       | 0.0392                                                                        | 0.0221                   |
| 14   | 64.1         | 0.0005                  | 0.9995    | Epiphytic   | 45                 | 2       | 0.0486                                                                        | 0.0255                   |
| 15   | 117.8        | 0.0009                  | 0.9991    | Epiphytic   | 90                 | 4       | 0.0323                                                                        | 0.0190                   |
| 16   | 91.5         | 0.0130                  | 0.9870    | Epiphytic   | 68                 | 3       | 0.0385                                                                        | 0.0217                   |
| 17   | 58.0         | 0.0018                  | 0.9982    | Epiphytic   | 45                 | 2       | 0.0537                                                                        | 0.0282                   |
| 18   | 41.9         | 0.0001                  | 0.9999    | Epiphytic   | 315                | 14      | 0.1207                                                                        | 0.0817                   |
| 19   | 40.8         | 0.0000                  | 1.0000    | Epiphytic   | 293                | 13      | 0.1222                                                                        | 0.0822                   |
| 20   | 29.2         | 0.0000                  | 1.0000    | Epiphytic   | 45                 | 2       | 0.1066                                                                        | 0.0560                   |
| 21   | 37.8         | 0.0000                  | 1.0000    | Epiphytic   | 248                | 11      | 0.1274                                                                        | 0.0844                   |
| 22   | 33.8         | 0.0000                  | 1.0000    | Epiphytic   | 68                 | 3       | 0.1042                                                                        | 0.0587                   |
| 23   | 23.5         | 0.0000                  | 1.0000    | Epiphytic   | 45                 | 2       | 0.1323                                                                        | 0.0694                   |
| 24   | 30.6         | 0.0000                  | 1.0000    | Epiphytic   | 180                | 8       | 0.1469                                                                        | 0.0942                   |
| 25   | 23.7         | 0.0000                  | 1.0000    | Epiphytic   | 68                 | 3       | 0.1486                                                                        | 0.0837                   |
| 26   | 10.1         | 0.0000                  | 1.0000    | Epiphytic   | 45                 | 2       | 0.3086                                                                        | 0.1620                   |
| 27   | 26.3         | 0.0000                  | 1.0000    | Epiphytic   | 113                | 5       | 0.1532                                                                        | 0.0930                   |
| 28   | 22.9         | 0.0000                  | 1.0000    | Epiphytic   | 45                 | 2       | 0.1361                                                                        | 0.0714                   |
| 29   | 25.6         | 0.0000                  | 1.0000    | Epiphytic   | 68                 | 3       | 0.1376                                                                        | 0.0775                   |
| 30   | 24.4         | 0.0000                  | 1.0000    | Epiphytic   | 45                 | 2       | 0.1277                                                                        | 0.0670                   |
| 31   | 276.4        | 0.9846                  | 0.0154    | Terrestrial | 8,303              | 369     | 0.0301                                                                        | 0.0241                   |
| 32   | 262.2        | 0.9872                  | 0.0128    | Terrestrial | 248                | 11      | 0.0184                                                                        | 0.0122                   |
| 33   | 228.0        | 0.9853                  | 0.0147    | Terrestrial | 90                 | 4       | 0.0167                                                                        | 0.0098                   |
| 34   | 56.2         | 0.9950                  | 0.0050    | Terrestrial | 45                 | 2       | 0.0554                                                                        | 0.0291                   |
| 35   | 114.1        | 0.9861                  | 0.0139    | Terrestrial | 45                 | 2       | 0.0273                                                                        | 0.0143                   |
| 36   | 120.2        | 0.9981                  | 0.0019    | Terrestrial | 158                | 7       | 0.0363                                                                        | 0.0230                   |
| 37   | 97.2         | 0.9978                  | 0.0022    | Terrestrial | 68                 | 3       | 0.0362                                                                        | 0.0204                   |
| 38   | 34.2         | 0.9991                  | 0.0009    | Terrestrial | 45                 | 2       | 0.0910                                                                        | 0.0478                   |
| 39   | 100.0        | 0.9987                  | 0.0013    | Terrestrial | 90                 | 4       | 0.0381                                                                        | 0.0224                   |
| 40   | 89.3         | 0.9984                  | 0.0016    | Terrestrial | 45                 | 2       | 0.0349                                                                        | 0.0183                   |
| 41   | 3.8          | 1.0000                  | 0.0000    | Terrestrial | 45                 | 2       | 0.8215                                                                        | 0.4313                   |
| 42   | 264.6        | 0.9929                  | 0.0071    | Terrestrial | 8,055              | 358     | 0.0314                                                                        | 0.0251                   |
| 43   | 218.4        | 0.9909                  | 0.0091    | Terrestrial | 158                | 7       | 0.0200                                                                        | 0.0126                   |
| 44   | 22.5         | 0.9991                  | 0.0009    | Terrestrial | 45                 | 2       | 0.1387                                                                        | 0.0728                   |
| 45   | 163.0        | 0.9922                  | 0.0078    | Terrestrial | 113                | 5       | 0.0247                                                                        | 0.0150                   |
| 46   | 136.4        | 0.9922                  | 0.0078    | Terrestrial | 90                 | 4       | 0.0279                                                                        | 0.0164                   |
| 47   | 28.3         | 0.9992                  | 0.0008    | Terrestrial | 68                 | 3       | 0.1242                                                                        | 0.0700                   |
| 48   | 5.7          | 1.0000                  | 0.0000    | Terrestrial | 45                 | 2       | 0.5511                                                                        | 0.2893                   |
| 49   | 234.7        | 0.9988                  | 0.0012    | Terrestrial | 7,898              | 351     | 0.0353                                                                        | 0.0282                   |
| 50   | 186.8        | 0.9943                  | 0.0057    | Terrestrial | 113                | 5       | 0.0216                                                                        | 0.0131                   |
| 51   | 102.7        | 0.9915                  | 0.0085    | Terrestrial | 45                 | 2       | 0.0303                                                                        | 0.0159                   |
| 52   | 88.6         | 0.9939                  | 0.0061    | Terrestrial | 68                 | 3       | 0.0397                                                                        | 0.0224                   |
| 53   | 18.0         | 0.9997                  | 0.0003    | Terrestrial | 45                 | 2       | 0.1731                                                                        | 0.0909                   |
| 54   | 223.2        | 0.9995                  | 0.0005    | Terrestrial | 7,785              | 346     | 0.0370                                                                        | 0.0296                   |
| 55   | 186.7        | 0.9997                  | 0.0003    | Terrestrial | 720                | 32      | 0.0315                                                                        | 0.0227                   |
| 56   | 175.9        | 0.9989                  | 0.0011    | Terrestrial | 113                | 5       | 0.0229                                                                        | 0.0139                   |
| 57   | 152.1        | 0.9973                  | 0.0027    | Terrestrial | 90                 | 4       | 0.0250                                                                        | 0.0147                   |
| 58   | 92.6         | 0.9949                  | 0.0051    | Terrestrial | 45                 | 2       | 0.0336                                                                        | 0.0176                   |
| 59   | 38.9         | 0.9983                  | 0.0017    | Terrestrial | 45                 | 2       | 0.0801                                                                        | 0.0421                   |

| Node | Best age, Ma | Reconstructed habit     |           |             | Species            |         | Estimated diversification rate,<br>net speciation events per<br>million years |                          |
|------|--------------|-------------------------|-----------|-------------|--------------------|---------|-------------------------------------------------------------------------------|--------------------------|
|      |              | Proportional likelihood |           | Decision    | Estimated<br>total | Sampled | Extinction<br>rate = 0.0                                                      | Extinction<br>rate = 0.9 |
|      |              | Terrestrial             | Epiphytic |             |                    |         |                                                                               |                          |
| 60   | 170.8        | 0.9998                  | 0.0002    | Terrestrial | 608                | 27      | 0.0335                                                                        | 0.0238                   |
| 61   | 168.6        | 0.9997                  | 0.0003    | Terrestrial | 90                 | 4       | 0.0226                                                                        | 0.0133                   |
| 62   | 143.3        | 0.9980                  | 0.0020    | Terrestrial | 68                 | 3       | 0.0246                                                                        | 0.0138                   |
| 63   | 135.2        | 0.9971                  | 0.0029    | Terrestrial | 45                 | 2       | 0.0230                                                                        | 0.0121                   |
| 64   | 168.3        | 0.9995                  | 0.0005    | Terrestrial | 518                | 23      | 0.0330                                                                        | 0.0232                   |
| 65   | 93.5         | 0.9999                  | 0.0001    | Terrestrial | 495                | 22      | 0.0589                                                                        | 0.0414                   |
| 66   | 88.1         | 0.9996                  | 0.0004    | Terrestrial | 135                | 6       | 0.0478                                                                        | 0.0297                   |
| 67   | 30.5         | 1.0000                  | 0.0000    | Terrestrial | 113                | 5       | 0.1321                                                                        | 0.0802                   |
| 68   | 5.1          | 1.0000                  | 0.0000    | Terrestrial | 45                 | 2       | 0.6057                                                                        | 0.3180                   |
| 69   | 28.3         | 1.0000                  | 0.0000    | Terrestrial | 68                 | 3       | 0.1245                                                                        | 0.0702                   |
| 70   | 22.8         | 1.0000                  | 0.0000    | Terrestrial | 45                 | 2       | 0.1364                                                                        | 0.0716                   |
| 71   | 86.8         | 1.0000                  | 0.0000    | Terrestrial | 360                | 16      | 0.0598                                                                        | 0.0410                   |
| 72   | 53.9         | 0.9995                  | 0.0005    | Terrestrial | 68                 | 3       | 0.0653                                                                        | 0.0368                   |
| 73   | 32.6         | 0.9997                  | 0.0003    | Terrestrial | 45                 | 2       | 0.0955                                                                        | 0.0502                   |
| 74   | 82.8         | 0.9999                  | 0.0001    | Terrestrial | 293                | 13      | 0.0602                                                                        | 0.0405                   |
| 75   | 49.2         | 1.0000                  | 0.0000    | Terrestrial | 135                | 6       | 0.0856                                                                        | 0.0532                   |
| 76   | 47.1         | 1.0000                  | 0.0000    | Terrestrial | 113                | 5       | 0.0856                                                                        | 0.0519                   |
| 77   | 44.1         | 0.9999                  | 0.0001    | Terrestrial | 45                 | 2       | 0.0706                                                                        | 0.0371                   |
| 78   | 43.4         | 1.0000                  | 0.0000    | Terrestrial | 68                 | 3       | 0.0811                                                                        | 0.0457                   |
| 79   | 40.2         | 0.9999                  | 0.0001    | Terrestrial | 45                 | 2       | 0.0774                                                                        | 0.0406                   |
| 80   | 55.5         | 1.0000                  | 0.0000    | Terrestrial | 158                | 7       | 0.0787                                                                        | 0.0498                   |
| 81   | 41.4         | 0.9999                  | 0.0001    | Terrestrial | 68                 | 3       | 0.0851                                                                        | 0.0479                   |
| 82   | 24.5         | 0.9999                  | 0.0001    | Terrestrial | 45                 | 2       | 0.1269                                                                        | 0.0666                   |
| 83   | 53.5         | 1.0000                  | 0.0000    | Terrestrial | 90                 | 4       | 0.0711                                                                        | 0.0419                   |
| 84   | 22.7         | 0.9998                  | 0.0002    | Terrestrial | 45                 | 2       | 0.1375                                                                        | 0.0722                   |
| 85   | 45.2         | 0.9998                  | 0.0002    | Terrestrial | 45                 | 2       | 0.0688                                                                        | 0.0361                   |
| 86   | 191.0        | 0.9997                  | 0.0003    | Terrestrial | 7,065              | 314     | 0.0428                                                                        | 0.0341                   |
| 87   | 179.9        | 0.9991                  | 0.0009    | Terrestrial | 180                | 8       | 0.0250                                                                        | 0.0161                   |
| 88   | 167.1        | 0.9983                  | 0.0017    | Terrestrial | 158                | 7       | 0.0261                                                                        | 0.0165                   |
| 89   | 151.0        | 0.9967                  | 0.0033    | Terrestrial | 135                | 6       | 0.0279                                                                        | 0.0173                   |
| 90   | 47.0         | 0.9991                  | 0.0009    | Terrestrial | 113                | 5       | 0.0858                                                                        | 0.0521                   |
| 91   | 27.0         | 0.9997                  | 0.0003    | Terrestrial | 45                 | 2       | 0.1152                                                                        | 0.0605                   |
| 92   | 10.7         | 1.0000                  | 0.0000    | Terrestrial | 68                 | 3       | 0.3286                                                                        | 0.1852                   |
| 93   | 4.2          | 1.0000                  | 0.0000    | Terrestrial | 45                 | 2       | 0.7361                                                                        | 0.3864                   |
| 94   | 165.6        | 0.9998                  | 0.0002    | Terrestrial | 6,885              | 306     | 0.0492                                                                        | 0.0392                   |
| 95   | 119.3        | 0.9994                  | 0.0006    | Terrestrial | 248                | 11      | 0.0404                                                                        | 0.0268                   |
| 96   | 72.2         | 0.9992                  | 0.0008    | Terrestrial | 113                | 5       | 0.0558                                                                        | 0.0339                   |
| 97   | 25.7         | 0.9996                  | 0.0004    | Terrestrial | 45                 | 2       | 0.1212                                                                        | 0.0636                   |
| 98   | 47.0         | 0.9994                  | 0.0006    | Terrestrial | 68                 | 3       | 0.0749                                                                        | 0.0422                   |
| 99   | 9.7          | 1.0000                  | 0.0000    | Terrestrial | 45                 | 2       | 0.3200                                                                        | 0.1680                   |
| 100  | 106.3        | 0.9992                  | 0.0008    | Terrestrial | 135                | 6       | 0.0396                                                                        | 0.0246                   |
| 101  | 71.7         | 0.9998                  | 0.0002    | Terrestrial | 113                | 5       | 0.0562                                                                        | 0.0341                   |
| 102  | 67.1         | 0.9999                  | 0.0001    | Terrestrial | 90                 | 4       | 0.0567                                                                        | 0.0334                   |
| 103  | 62.9         | 0.9999                  | 0.0001    | Terrestrial | 68                 | 3       | 0.0560                                                                        | 0.0315                   |
| 104  | 52.9         | 0.9997                  | 0.0003    | Terrestrial | 45                 | 2       | 0.0589                                                                        | 0.0309                   |
| 105  | 163.2        | 0.9997                  | 0.0003    | Terrestrial | 6,638              | 295     | 0.0497                                                                        | 0.0395                   |
| 106  | 110.8        | 0.9998                  | 0.0002    | Terrestrial | 1,193              | 53      | 0.0577                                                                        | 0.0427                   |
| 107  | 58.5         | 0.9994                  | 0.0006    | Terrestrial | 68                 | 3       | 0.0602                                                                        | 0.0339                   |
| 108  | 44.3         | 0.9995                  | 0.0005    | Terrestrial | 45                 | 2       | 0.0702                                                                        | 0.0369                   |
| 109  | 106.7        | 1.0000                  | 0.0000    | Terrestrial | 1,125              | 50      | 0.0594                                                                        | 0.0439                   |
| 110  | 100.3        | 0.9998                  | 0.0002    | Terrestrial | 450                | 20      | 0.0540                                                                        | 0.0376                   |
| 111  | 62.1         | 0.9985                  | 0.0015    | Terrestrial | 45                 | 2       | 0.0502                                                                        | 0.0263                   |
| 112  | 56.2         | 1.0000                  | 0.0000    | Terrestrial | 405                | 18      | 0.0945                                                                        | 0.0653                   |
| 113  | 53.8         | 1.0000                  | 0.0000    | Terrestrial | 158                | 7       | 0.0812                                                                        | 0.0513                   |
| 114  | 24.3         | 0.9998                  | 0.0002    | Terrestrial | 45                 | 2       | 0.1283                                                                        | 0.0674                   |
| 115  | 44.7         | 0.9999                  | 0.0001    | Terrestrial | 113                | 5       | 0.0902                                                                        | 0.0547                   |
| 116  | 2.4          | 1.0000                  | 0.0000    | Terrestrial | 45                 | 2       | 1.2813                                                                        | 0.6726                   |
| 117  | 29.4         | 0.9999                  | 0.0001    | Terrestrial | 68                 | 3       | 0.1198                                                                        | 0.0675                   |
| 118  | 7.6          | 1.0000                  | 0.0000    | Terrestrial | 45                 | 2       | 0.4075                                                                        | 0.2139                   |
| 119  | 51.3         | 1.0000                  | 0.0000    | Terrestrial | 248                | 11      | 0.0939                                                                        | 0.0623                   |
| 120  | 46.7         | 0.9999                  | 0.0001    | Terrestrial | 45                 | 2       | 0.0667                                                                        | 0.0350                   |

| Node | Best age, Ma | Reconstructed habit     |           |             | Species            |         | Estimated diversification rate,<br>net speciation events per<br>million years |                          |
|------|--------------|-------------------------|-----------|-------------|--------------------|---------|-------------------------------------------------------------------------------|--------------------------|
|      |              | Proportional likelihood |           | Decision    | Estimated<br>total | Sampled | Extinction<br>rate = 0.0                                                      | Extinction<br>rate = 0.9 |
|      |              | Terrestrial             | Epiphytic |             |                    |         |                                                                               |                          |
| 121  | 24.9         | 1.0000                  | 0.0000    | Terrestrial | 203                | 9       | 0.1857                                                                        | 0.1207                   |
| 122  | 19.7         | 1.0000                  | 0.0000    | Terrestrial | 180                | 8       | 0.2280                                                                        | 0.1463                   |
| 123  | 10.8         | 1.0000                  | 0.0000    | Terrestrial | 68                 | 3       | 0.3273                                                                        | 0.1845                   |
| 124  | 3.0          | 1.0000                  | 0.0000    | Terrestrial | 45                 | 2       | 1.0242                                                                        | 0.5377                   |
| 125  | 19.3         | 1.0000                  | 0.0000    | Terrestrial | 113                | 5       | 0.2086                                                                        | 0.1266                   |
| 126  | 16.4         | 1.0000                  | 0.0000    | Terrestrial | 45                 | 2       | 0.1896                                                                        | 0.0995                   |
| 127  | 18.6         | 1.0000                  | 0.0000    | Terrestrial | 68                 | 3       | 0.1896                                                                        | 0.1068                   |
| 128  | 6.6          | 1.0000                  | 0.0000    | Terrestrial | 45                 | 2       | 0.4703                                                                        | 0.2469                   |
| 129  | 92.7         | 0.9996                  | 0.0004    | Terrestrial | 675                | 30      | 0.0628                                                                        | 0.0451                   |
| 130  | 81.2         | 0.9996                  | 0.0004    | Terrestrial | 338                | 15      | 0.0631                                                                        | 0.0430                   |
| 131  | 52.7         | 0.9998                  | 0.0002    | Terrestrial | 315                | 14      | 0.0961                                                                        | 0.0651                   |
| 132  | 42.8         | 1.0000                  | 0.0000    | Terrestrial | 293                | 13      | 0.1166                                                                        | 0.0785                   |
| 133  | 37.1         | 1.0000                  | 0.0000    | Terrestrial | 135                | 6       | 0.1137                                                                        | 0.0706                   |
| 134  | 27.0         | 0.9999                  | 0.0001    | Terrestrial | 45                 | 2       | 0.1152                                                                        | 0.0605                   |
| 135  | 28.2         | 1.0000                  | 0.0000    | Terrestrial | 90                 | 4       | 0.1348                                                                        | 0.0794                   |
| 136  | 21.9         | 1.0000                  | 0.0000    | Terrestrial | 68                 | 3       | 0.1608                                                                        | 0.0906                   |
| 137  | 20.4         | 1.0000                  | 0.0000    | Terrestrial | 45                 | 2       | 0.1527                                                                        | 0.0802                   |
| 138  | 34.8         | 1.0000                  | 0.0000    | Terrestrial | 158                | 7       | 0.1256                                                                        | 0.0794                   |
| 139  | 26.0         | 1.0000                  | 0.0000    | Terrestrial | 135                | 6       | 0.1620                                                                        | 0.1006                   |
| 140  | 24.5         | 1.0000                  | 0.0000    | Terrestrial | 113                | 5       | 0.1647                                                                        | 0.1000                   |
| 141  | 21.4         | 1.0000                  | 0.0000    | Terrestrial | 45                 | 2       | 0.1456                                                                        | 0.0765                   |
| 142  | 23.6         | 1.0000                  | 0.0000    | Terrestrial | 68                 | 3       | 0.1494                                                                        | 0.0842                   |
| 143  | 20.3         | 1.0000                  | 0.0000    | Terrestrial | 45                 | 2       | 0.1532                                                                        | 0.0804                   |
| 144  | 80.3         | 0.9952                  | 0.0048    | Terrestrial | 338                | 15      | 0.0639                                                                        | 0.0435                   |
| 145  | 66.9         | 0.9999                  | 0.0001    | Terrestrial | 135                | 6       | 0.0629                                                                        | 0.0391                   |
| 146  | 64.6         | 0.9999                  | 0.0001    | Terrestrial | 68                 | 3       | 0.0545                                                                        | 0.0307                   |
| 147  | 49.2         | 0.9996                  | 0.0004    | Terrestrial | 45                 | 2       | 0.0633                                                                        | 0.0332                   |
| 148  | 61.1         | 0.9998                  | 0.0002    | Terrestrial | 68                 | 3       | 0.0576                                                                        | 0.0325                   |
| 149  | 21.0         | 0.9998                  | 0.0002    | Terrestrial | 45                 | 2       | 0.1485                                                                        | 0.0780                   |
| 150  | 74.4         | 0.9506                  | 0.0494    | Terrestrial | 203                | 9       | 0.0620                                                                        | 0.0403                   |
| 151  | 45.7         | 0.0019                  | 0.9981    | Epiphytic   | 180                | 8       | 0.0985                                                                        | 0.0632                   |
| 152  | 41.0         | 0.0002                  | 0.9998    | Epiphytic   | 90                 | 4       | 0.0928                                                                        | 0.0546                   |
| 153  | 29.6         | 0.0000                  | 1.0000    | Epiphytic   | 68                 | 3       | 0.1188                                                                        | 0.0669                   |
| 154  | 18.9         | 0.0000                  | 1.0000    | Epiphytic   | 45                 | 2       | 0.1646                                                                        | 0.0864                   |
| 155  | 34.4         | 0.0000                  | 1.0000    | Epiphytic   | 90                 | 4       | 0.1105                                                                        | 0.0651                   |
| 156  | 22.1         | 0.0000                  | 1.0000    | Epiphytic   | 45                 | 2       | 0.1407                                                                        | 0.0739                   |
| 157  | 25.8         | 0.0000                  | 1.0000    | Epiphytic   | 45                 | 2       | 0.1209                                                                        | 0.0635                   |
| 158  | 116.7        | 0.9975                  | 0.0025    | Terrestrial | 5,445              | 242     | 0.0678                                                                        | 0.0536                   |
| 159  | 103.1        | 0.9998                  | 0.0002    | Terrestrial | 2,070              | 92      | 0.0674                                                                        | 0.0513                   |
| 160  | 72.2         | 0.9984                  | 0.0016    | Terrestrial | 45                 | 2       | 0.0431                                                                        | 0.0226                   |
| 161  | 100.7        | 0.9998                  | 0.0002    | Terrestrial | 2,025              | 90      | 0.0687                                                                        | 0.0523                   |
| 162  | 92.6         | 0.9942                  | 0.0058    | Terrestrial | 675                | 30      | 0.0628                                                                        | 0.0451                   |
| 163  | 57.7         | 0.9103                  | 0.0897    | Terrestrial | 653                | 29      | 0.1003                                                                        | 0.0717                   |
| 164  | 19.7         | 0.9970                  | 0.0030    | Terrestrial | 45                 | 2       | 0.1580                                                                        | 0.0830                   |
| 165  | 41.9         | 0.6074                  | 0.3926    | Ambiguous   | 608                | 27      | 0.1364                                                                        | 0.0971                   |
| 166  | 23.6         | 0.0136                  | 0.9864    | Epiphytic   | 68                 | 3       | 0.1490                                                                        | 0.0840                   |
| 167  | 6.2          | 0.0000                  | 1.0000    | Epiphytic   | 45                 | 2       | 0.5022                                                                        | 0.2636                   |
| 168  | 35.9         | 0.6190                  | 0.3810    | Ambiguous   | 540                | 24      | 0.1561                                                                        | 0.1103                   |
| 169  | 34.9         | 0.6166                  | 0.3834    | Ambiguous   | 518                | 23      | 0.1590                                                                        | 0.1120                   |
| 170  | 33.5         | 0.0607                  | 0.9393    | Epiphytic   | 225                | 10      | 0.1408                                                                        | 0.0925                   |
| 171  | 23.5         | 0.0004                  | 0.9996    | Epiphytic   | 90                 | 4       | 0.1621                                                                        | 0.0954                   |
| 172  | 19.8         | 0.0000                  | 1.0000    | Epiphytic   | 45                 | 2       | 0.1575                                                                        | 0.0827                   |
| 173  | 7.2          | 0.0000                  | 1.0000    | Epiphytic   | 45                 | 2       | 0.4348                                                                        | 0.2283                   |
| 174  | 18.1         | 0.0001                  | 0.9999    | Epiphytic   | 135                | 6       | 0.2326                                                                        | 0.1444                   |
| 175  | 16.5         | 0.0001                  | 0.9999    | Epiphytic   | 68                 | 3       | 0.2135                                                                        | 0.1203                   |
| 176  | 12.7         | 0.0038                  | 0.9962    | Epiphytic   | 45                 | 2       | 0.2454                                                                        | 0.1288                   |
| 177  | 17.4         | 0.0001                  | 0.9999    | Epiphytic   | 68                 | 3       | 0.2020                                                                        | 0.1138                   |
| 178  | 9.4          | 0.0079                  | 0.9921    | Epiphytic   | 45                 | 2       | 0.3323                                                                        | 0.1744                   |
| 179  | 33.5         | 0.8963                  | 0.1037    | Terrestrial | 293                | 13      | 0.1490                                                                        | 0.1003                   |
| 180  | 32.1         | 0.9250                  | 0.0750    | Terrestrial | 270                | 12      | 0.1527                                                                        | 0.1020                   |
| 181  | 25.6         | 0.9812                  | 0.0188    | Terrestrial | 45                 | 2       | 0.1216                                                                        | 0.0638                   |

| Node | Best age, Ma | Reconstructed habit     |           |             | Species            |         | Estimated diversification rate,<br>net speciation events per<br>million years |                          |
|------|--------------|-------------------------|-----------|-------------|--------------------|---------|-------------------------------------------------------------------------------|--------------------------|
|      |              | Proportional likelihood |           | Decision    | Estimated<br>total | Sampled | Extinction<br>rate = 0.0                                                      | Extinction<br>rate = 0.9 |
|      |              | Terrestrial             | Epiphytic |             |                    |         |                                                                               |                          |
| 182  | 29.6         | 0.9258                  | 0.0742    | Terrestrial | 225                | 10      | 0.1597                                                                        | 0.1049                   |
| 183  | 18.0         | 0.7314                  | 0.2686    | Ambiguous   | 113                | 5       | 0.2241                                                                        | 0.1360                   |
| 184  | 15.3         | 0.0067                  | 0.9933    | Epiphytic   | 90                 | 4       | 0.2486                                                                        | 0.1464                   |
| 185  | 13.7         | 0.0003                  | 0.9997    | Epiphytic   | 68                 | 3       | 0.2565                                                                        | 0.1445                   |
| 186  | 7.5          | 0.0000                  | 1.0000    | Epiphytic   | 45                 | 2       | 0.4140                                                                        | 0.2174                   |
| 187  | 26.9         | 0.9601                  | 0.0399    | Terrestrial | 113                | 5       | 0.1499                                                                        | 0.0910                   |
| 188  | 17.7         | 0.9958                  | 0.0042    | Terrestrial | 45                 | 2       | 0.1755                                                                        | 0.0921                   |
| 189  | 24.7         | 0.9605                  | 0.0395    | Terrestrial | 68                 | 3       | 0.1428                                                                        | 0.0804                   |
| 190  | 19.5         | 0.9441                  | 0.0559    | Terrestrial | 45                 | 2       | 0.1599                                                                        | 0.0840                   |
| 191  | 95.6         | 1.0000                  | 0.0000    | Terrestrial | 1,350              | 60      | 0.0682                                                                        | 0.0509                   |
| 192  | 68.5         | 0.9999                  | 0.0001    | Terrestrial | 630                | 28      | 0.0840                                                                        | 0.0600                   |
| 193  | 45.9         | 0.9997                  | 0.0003    | Terrestrial | 68                 | 3       | 0.0767                                                                        | 0.0432                   |
| 194  | 24.2         | 0.9998                  | 0.0002    | Terrestrial | 45                 | 2       | 0.1289                                                                        | 0.0677                   |
| 195  | 57.0         | 1.0000                  | 0.0000    | Terrestrial | 563                | 25      | 0.0989                                                                        | 0.0701                   |
| 196  | 53.6         | 1.0000                  | 0.0000    | Terrestrial | 540                | 24      | 0.1044                                                                        | 0.0737                   |
| 197  | 44.3         | 0.9998                  | 0.0002    | Terrestrial | 180                | 8       | 0.1017                                                                        | 0.0652                   |
| 198  | 11.3         | 1.0000                  | 0.0000    | Terrestrial | 158                | 7       | 0.3867                                                                        | 0.2445                   |
| 199  | 5.7          | 1.0000                  | 0.0000    | Terrestrial | 135                | 6       | 0.7455                                                                        | 0.4630                   |
| 200  | 4.2          | 1.0000                  | 0.0000    | Terrestrial | 113                | 5       | 0.9710                                                                        | 0.5894                   |
| 201  | 3.4          | 1.0000                  | 0.0000    | Terrestrial | 90                 | 4       | 1.1066                                                                        | 0.6514                   |
| 202  | 2.5          | 1.0000                  | 0.0000    | Terrestrial | 45                 | 2       | 1.2404                                                                        | 0.6512                   |
| 203  | 46.4         | 0.9999                  | 0.0001    | Terrestrial | 360                | 16      | 0.1119                                                                        | 0.0766                   |
| 204  | 33.3         | 1.0000                  | 0.0000    | Terrestrial | 338                | 15      | 0.1540                                                                        | 0.1049                   |
| 205  | 19.7         | 0.9999                  | 0.0001    | Terrestrial | 45                 | 2       | 0.1579                                                                        | 0.0829                   |
| 206  | 27.4         | 1.0000                  | 0.0000    | Terrestrial | 293                | 13      | 0.1819                                                                        | 0.1224                   |
| 207  | 18.0         | 1.0000                  | 0.0000    | Terrestrial | 90                 | 4       | 0.2117                                                                        | 0.1246                   |
| 208  | 6.8          | 1.0000                  | 0.0000    | Terrestrial | 45                 | 2       | 0.4613                                                                        | 0.2422                   |
| 209  | 4.7          | 1.0000                  | 0.0000    | Terrestrial | 45                 | 2       | 0.6639                                                                        | 0.3485                   |
| 210  | 25.9         | 1.0000                  | 0.0000    | Terrestrial | 203                | 9       | 0.1784                                                                        | 0.1159                   |
| 211  | 19.0         | 1.0000                  | 0.0000    | Terrestrial | 180                | 8       | 0.2367                                                                        | 0.1519                   |
| 212  | 16.3         | 1.0000                  | 0.0000    | Terrestrial | 158                | 7       | 0.2679                                                                        | 0.1694                   |
| 213  | 15.0         | 1.0000                  | 0.0000    | Terrestrial | 135                | 6       | 0.2801                                                                        | 0.1739                   |
| 214  | 10.8         | 1.0000                  | 0.0000    | Terrestrial | 113                | 5       | 0.3721                                                                        | 0.2258                   |
| 215  | 10.6         | 1.0000                  | 0.0000    | Terrestrial | 90                 | 4       | 0.3601                                                                        | 0.2120                   |
| 216  | 3.7          | 1.0000                  | 0.0000    | Terrestrial | 45                 | 2       | 0.8370                                                                        | 0.4394                   |
| 217  | 9.4          | 1.0000                  | 0.0000    | Terrestrial | 45                 | 2       | 0.3309                                                                        | 0.1737                   |
| 218  | 92.0         | 1.0000                  | 0.0000    | Terrestrial | 720                | 32      | 0.0640                                                                        | 0.0461                   |
| 219  | 89.8         | 1.0000                  | 0.0000    | Terrestrial | 698                | 31      | 0.0652                                                                        | 0.0468                   |
| 220  | 77.8         | 0.9998                  | 0.0002    | Terrestrial | 248                | 11      | 0.0619                                                                        | 0.0411                   |
| 221  | 59.8         | 1.0000                  | 0.0000    | Terrestrial | 225                | 10      | 0.0789                                                                        | 0.0518                   |
| 222  | 49.1         | 0.9997                  | 0.0003    | Terrestrial | 45                 | 2       | 0.0634                                                                        | 0.0333                   |
| 223  | 57.1         | 1.0000                  | 0.0000    | Terrestrial | 180                | 8       | 0.0788                                                                        | 0.0505                   |
| 224  | 47.1         | 1.0000                  | 0.0000    | Terrestrial | 158                | 7       | 0.0927                                                                        | 0.0586                   |
| 225  | 44.2         | 0.9999                  | 0.0001    | Terrestrial | 135                | 6       | 0.0954                                                                        | 0.0592                   |
| 226  | 37.2         | 0.9994                  | 0.0006    | Terrestrial | 113                | 5       | 0.1084                                                                        | 0.0658                   |
| 227  | 31.9         | 0.9997                  | 0.0003    | Terrestrial | 45                 | 2       | 0.0975                                                                        | 0.0512                   |
| 228  | 12.3         | 0.9326                  | 0.0674    | Terrestrial | 68                 | 3       | 0.2870                                                                        | 0.1617                   |
| 229  | 1.8          | 0.9999                  | 0.0001    | Terrestrial | 45                 | 2       | 1.6921                                                                        | 0.8883                   |
| 230  | 78.4         | 0.9999                  | 0.0001    | Terrestrial | 450                | 20      | 0.0691                                                                        | 0.0481                   |
| 231  | 24.7         | 0.9998                  | 0.0002    | Terrestrial | 90                 | 4       | 0.1542                                                                        | 0.0908                   |
| 232  | 9.2          | 1.0000                  | 0.0000    | Terrestrial | 68                 | 3       | 0.3813                                                                        | 0.2148                   |
| 233  | 6.8          | 1.0000                  | 0.0000    | Terrestrial | 45                 | 2       | 0.4559                                                                        | 0.2393                   |
| 234  | 68.4         | 0.9999                  | 0.0001    | Terrestrial | 360                | 16      | 0.0760                                                                        | 0.0520                   |
| 235  | 42.6         | 0.9999                  | 0.0001    | Terrestrial | 135                | 6       | 0.0988                                                                        | 0.0614                   |
| 236  | 35.9         | 0.9999                  | 0.0001    | Terrestrial | 113                | 5       | 0.1123                                                                        | 0.0681                   |
| 237  | 19.0         | 1.0000                  | 0.0000    | Terrestrial | 90                 | 4       | 0.2007                                                                        | 0.1181                   |
| 238  | 5.3          | 1.0000                  | 0.0000    | Terrestrial | 45                 | 2       | 0.5897                                                                        | 0.3096                   |
| 239  | 16.3         | 1.0000                  | 0.0000    | Terrestrial | 45                 | 2       | 0.1912                                                                        | 0.1004                   |
| 240  | 47.3         | 0.9999                  | 0.0001    | Terrestrial | 225                | 10      | 0.0999                                                                        | 0.0656                   |
| 241  | 33.5         | 0.9999                  | 0.0001    | Terrestrial | 90                 | 4       | 0.1137                                                                        | 0.0669                   |
| 242  | 17.5         | 1.0000                  | 0.0000    | Terrestrial | 68                 | 3       | 0.2006                                                                        | 0.1131                   |



| Node | Best age, Ma | Reconstructed habit     |           |             | Species            |         | Estimated diversification rate,<br>net speciation events per<br>million years |                          |
|------|--------------|-------------------------|-----------|-------------|--------------------|---------|-------------------------------------------------------------------------------|--------------------------|
|      |              | Proportional likelihood |           | Decision    | Estimated<br>total | Sampled | Extinction<br>rate = 0.0                                                      | Extinction<br>rate = 0.9 |
|      |              | Terrestrial             | Epiphytic |             |                    |         |                                                                               |                          |
| 304  | 5.5          | 0.0000                  | 1.0000    | Epiphytic   | 90                 | 4       | 0.6896                                                                        | 0.4060                   |
| 305  | 5.3          | 0.0000                  | 1.0000    | Epiphytic   | 68                 | 3       | 0.6640                                                                        | 0.3742                   |
| 306  | 4.9          | 0.0000                  | 1.0000    | Epiphytic   | 45                 | 2       | 0.6303                                                                        | 0.3309                   |
| 307  | 14.2         | 0.0000                  | 1.0000    | Epiphytic   | 293                | 13      | 0.3508                                                                        | 0.2361                   |
| 308  | 5.1          | 0.0000                  | 1.0000    | Epiphytic   | 90                 | 4       | 0.7406                                                                        | 0.4360                   |
| 309  | 4.4          | 0.0000                  | 1.0000    | Epiphytic   | 45                 | 2       | 0.7060                                                                        | 0.3706                   |
| 310  | 4.9          | 0.0000                  | 1.0000    | Epiphytic   | 45                 | 2       | 0.6380                                                                        | 0.3349                   |
| 311  | 9.2          | 0.0000                  | 1.0000    | Epiphytic   | 203                | 9       | 0.5030                                                                        | 0.3268                   |
| 312  | 8.4          | 0.0000                  | 1.0000    | Epiphytic   | 90                 | 4       | 0.4537                                                                        | 0.2671                   |
| 313  | 7.7          | 0.0000                  | 1.0000    | Epiphytic   | 68                 | 3       | 0.4588                                                                        | 0.2585                   |
| 314  | 7.0          | 0.0000                  | 1.0000    | Epiphytic   | 45                 | 2       | 0.4448                                                                        | 0.2335                   |
| 315  | 5.8          | 0.0000                  | 1.0000    | Epiphytic   | 113                | 5       | 0.6948                                                                        | 0.4217                   |
| 316  | 5.5          | 0.0000                  | 1.0000    | Epiphytic   | 90                 | 4       | 0.6934                                                                        | 0.4082                   |
| 317  | 5.1          | 0.0000                  | 1.0000    | Epiphytic   | 68                 | 3       | 0.6846                                                                        | 0.3858                   |
| 318  | 4.1          | 0.0010                  | 0.9990    | Epiphytic   | 45                 | 2       | 0.7575                                                                        | 0.3977                   |
| 319  | 92.5         | 0.8763                  | 0.1237    | Ambiguous   | 1,800              | 80      | 0.0736                                                                        | 0.0557                   |
| 320  | 88.7         | 0.8736                  | 0.1264    | Ambiguous   | 113                | 5       | 0.0454                                                                        | 0.0276                   |
| 321  | 6.8          | 0.0005                  | 0.9995    | Epiphytic   | 45                 | 2       | 0.4579                                                                        | 0.2404                   |
| 322  | 67.5         | 0.9580                  | 0.0420    | Terrestrial | 68                 | 3       | 0.0521                                                                        | 0.0294                   |
| 323  | 17.1         | 0.9991                  | 0.0009    | Terrestrial | 45                 | 2       | 0.1820                                                                        | 0.0955                   |
| 324  | 66.1         | 0.3484                  | 0.6516    | Ambiguous   | 1,688              | 75      | 0.1019                                                                        | 0.0769                   |
| 325  | 61.1         | 0.4205                  | 0.5795    | Ambiguous   | 248                | 11      | 0.0789                                                                        | 0.0523                   |
| 326  | 25.4         | 0.3984                  | 0.6016    | Ambiguous   | 45                 | 2       | 0.1224                                                                        | 0.0643                   |
| 327  | 50.4         | 0.8710                  | 0.1290    | Ambiguous   | 203                | 9       | 0.0916                                                                        | 0.0595                   |
| 328  | 31.9         | 0.9986                  | 0.0014    | Terrestrial | 180                | 8       | 0.1411                                                                        | 0.0906                   |
| 329  | 26.9         | 0.9995                  | 0.0005    | Terrestrial | 45                 | 2       | 0.1157                                                                        | 0.0607                   |
| 330  | 24.6         | 0.9999                  | 0.0001    | Terrestrial | 135                | 6       | 0.1712                                                                        | 0.1063                   |
| 331  | 16.5         | 1.0000                  | 0.0000    | Terrestrial | 113                | 5       | 0.2445                                                                        | 0.1484                   |
| 332  | 13.6         | 1.0000                  | 0.0000    | Terrestrial | 45                 | 2       | 0.2291                                                                        | 0.1203                   |
| 333  | 11.7         | 1.0000                  | 0.0000    | Terrestrial | 68                 | 3       | 0.3003                                                                        | 0.1692                   |
| 334  | 2.7          | 1.0000                  | 0.0000    | Terrestrial | 45                 | 2       | 1.1749                                                                        | 0.6168                   |
| 335  | 63.6         | 0.0285                  | 0.9715    | Epiphytic   | 1,440              | 64      | 0.1034                                                                        | 0.0774                   |
| 336  | 60.4         | 0.0017                  | 0.9983    | Epiphytic   | 1,418              | 63      | 0.1086                                                                        | 0.0812                   |
| 337  | 19.4         | 0.0000                  | 1.0000    | Epiphytic   | 90                 | 4       | 0.1965                                                                        | 0.1157                   |
| 338  | 12.0         | 0.0000                  | 1.0000    | Epiphytic   | 45                 | 2       | 0.2601                                                                        | 0.1366                   |
| 339  | 14.3         | 0.0000                  | 1.0000    | Epiphytic   | 45                 | 2       | 0.2177                                                                        | 0.1143                   |
| 340  | 55.8         | 0.0001                  | 0.9999    | Epiphytic   | 1,328              | 59      | 0.1164                                                                        | 0.0868                   |
| 341  | 40.2         | 0.0001                  | 0.9999    | Epiphytic   | 45                 | 2       | 0.0774                                                                        | 0.0406                   |
| 342  | 44.0         | 0.0000                  | 1.0000    | Epiphytic   | 1,283              | 57      | 0.1468                                                                        | 0.1092                   |
| 343  | 31.9         | 0.0000                  | 1.0000    | Epiphytic   | 90                 | 4       | 0.1192                                                                        | 0.0702                   |
| 344  | 12.0         | 0.0000                  | 1.0000    | Epiphytic   | 68                 | 3       | 0.2923                                                                        | 0.1647                   |
| 345  | 7.4          | 0.0000                  | 1.0000    | Epiphytic   | 45                 | 2       | 0.4230                                                                        | 0.2221                   |
| 346  | 43.3         | 0.0000                  | 1.0000    | Epiphytic   | 270                | 12      | 0.1134                                                                        | 0.0758                   |
| 347  | 42.5         | 0.0000                  | 1.0000    | Epiphytic   | 248                | 11      | 0.1134                                                                        | 0.0752                   |
| 348  | 35.1         | 0.0000                  | 1.0000    | Epiphytic   | 68                 | 3       | 0.1003                                                                        | 0.0565                   |
| 349  | 23.0         | 0.0000                  | 1.0000    | Epiphytic   | 45                 | 2       | 0.1353                                                                        | 0.0710                   |
| 350  | 35.1         | 0.0000                  | 1.0000    | Epiphytic   | 180                | 8       | 0.1284                                                                        | 0.0824                   |
| 351  | 31.9         | 0.0000                  | 1.0000    | Epiphytic   | 158                | 7       | 0.1367                                                                        | 0.0865                   |
| 352  | 30.0         | 0.0000                  | 1.0000    | Epiphytic   | 135                | 6       | 0.1406                                                                        | 0.0873                   |
| 353  | 27.0         | 0.0008                  | 0.9992    | Epiphytic   | 113                | 5       | 0.1493                                                                        | 0.0906                   |
| 354  | 19.6         | 0.0000                  | 1.0000    | Epiphytic   | 90                 | 4       | 0.1945                                                                        | 0.1145                   |
| 355  | 17.3         | 0.0000                  | 1.0000    | Epiphytic   | 68                 | 3       | 0.2035                                                                        | 0.1147                   |
| 356  | 10.7         | 0.0000                  | 1.0000    | Epiphytic   | 45                 | 2       | 0.2918                                                                        | 0.1532                   |
| 357  | 43.0         | 0.0000                  | 1.0000    | Epiphytic   | 923                | 41      | 0.1426                                                                        | 0.1043                   |
| 358  | 39.2         | 0.0000                  | 1.0000    | Epiphytic   | 135                | 6       | 0.1076                                                                        | 0.0668                   |
| 359  | 37.0         | 0.0000                  | 1.0000    | Epiphytic   | 113                | 5       | 0.1088                                                                        | 0.0660                   |
| 360  | 30.7         | 0.0000                  | 1.0000    | Epiphytic   | 45                 | 2       | 0.1015                                                                        | 0.0533                   |
| 361  | 14.2         | 0.0000                  | 1.0000    | Epiphytic   | 68                 | 3       | 0.2487                                                                        | 0.1401                   |
| 362  | 9.7          | 0.0000                  | 1.0000    | Epiphytic   | 45                 | 2       | 0.3220                                                                        | 0.1690                   |
| 363  | 42.0         | 0.0000                  | 1.0000    | Epiphytic   | 788                | 35      | 0.1422                                                                        | 0.1030                   |
| 364  | 39.8         | 0.0000                  | 1.0000    | Epiphytic   | 68                 | 3       | 0.0883                                                                        | 0.0498                   |

| Node | Best age, Ma | Reconstructed habit     |           |           | Species            |         | Estimated diversification rate,<br>net speciation events per<br>million years |                          |
|------|--------------|-------------------------|-----------|-----------|--------------------|---------|-------------------------------------------------------------------------------|--------------------------|
|      |              | Proportional likelihood |           | Decision  | Estimated<br>total | Sampled | Extinction<br>rate = 0.0                                                      | Extinction<br>rate = 0.9 |
|      |              | Terrestrial             | Epiphytic |           |                    |         |                                                                               |                          |
| 365  | 36.2         | 0.0000                  | 1.0000    | Epiphytic | 45                 | 2       | 0.0861                                                                        | 0.0452                   |
| 366  | 40.0         | 0.0000                  | 1.0000    | Epiphytic | 720                | 32      | 0.1473                                                                        | 0.1061                   |
| 367  | 15.5         | 0.0000                  | 1.0000    | Epiphytic | 45                 | 2       | 0.2007                                                                        | 0.1054                   |
| 368  | 31.2         | 0.0000                  | 1.0000    | Epiphytic | 675                | 30      | 0.1865                                                                        | 0.1337                   |
| 369  | 30.6         | 0.0000                  | 1.0000    | Epiphytic | 653                | 29      | 0.1889                                                                        | 0.1351                   |
| 370  | 21.7         | 0.0000                  | 1.0000    | Epiphytic | 90                 | 4       | 0.1753                                                                        | 0.1032                   |
| 371  | 13.5         | 0.0000                  | 1.0000    | Epiphytic | 45                 | 2       | 0.2313                                                                        | 0.1214                   |
| 372  | 20.9         | 0.0000                  | 1.0000    | Epiphytic | 45                 | 2       | 0.1491                                                                        | 0.0783                   |
| 373  | 26.9         | 0.0000                  | 1.0000    | Epiphytic | 563                | 25      | 0.2093                                                                        | 0.1483                   |
| 374  | 23.0         | 0.0000                  | 1.0000    | Epiphytic | 45                 | 2       | 0.1353                                                                        | 0.0710                   |
| 375  | 25.2         | 0.0000                  | 1.0000    | Epiphytic | 518                | 23      | 0.2206                                                                        | 0.1554                   |
| 376  | 16.0         | 0.0000                  | 1.0000    | Epiphytic | 45                 | 2       | 0.1946                                                                        | 0.1022                   |
| 377  | 25.0         | 0.0000                  | 1.0000    | Epiphytic | 473                | 21      | 0.2186                                                                        | 0.1529                   |
| 378  | 23.3         | 0.0000                  | 1.0000    | Epiphytic | 113                | 5       | 0.1731                                                                        | 0.1051                   |
| 379  | 16.5         | 0.0000                  | 1.0000    | Epiphytic | 90                 | 4       | 0.2301                                                                        | 0.1355                   |
| 380  | 12.4         | 0.0009                  | 0.9991    | Epiphytic | 68                 | 3       | 0.2838                                                                        | 0.1599                   |
| 381  | 9.9          | 0.0000                  | 1.0000    | Epiphytic | 45                 | 2       | 0.3151                                                                        | 0.1654                   |
| 382  | 23.4         | 0.0000                  | 1.0000    | Epiphytic | 360                | 16      | 0.2216                                                                        | 0.1518                   |
| 383  | 22.2         | 0.0000                  | 1.0000    | Epiphytic | 68                 | 3       | 0.1587                                                                        | 0.0894                   |
| 384  | 9.5          | 0.0000                  | 1.0000    | Epiphytic | 45                 | 2       | 0.3295                                                                        | 0.1730                   |
| 385  | 22.3         | 0.0000                  | 1.0000    | Epiphytic | 293                | 13      | 0.2234                                                                        | 0.1503                   |
| 386  | 19.8         | 0.0000                  | 1.0000    | Epiphytic | 68                 | 3       | 0.1778                                                                        | 0.1002                   |
| 387  | 17.6         | 0.0000                  | 1.0000    | Epiphytic | 45                 | 2       | 0.1772                                                                        | 0.0930                   |
| 388  | 20.7         | 0.0000                  | 1.0000    | Epiphytic | 225                | 10      | 0.2279                                                                        | 0.1497                   |
| 389  | 17.3         | 0.0000                  | 1.0000    | Epiphytic | 90                 | 4       | 0.2197                                                                        | 0.1293                   |
| 390  | 14.4         | 0.0000                  | 1.0000    | Epiphytic | 68                 | 3       | 0.2439                                                                        | 0.1374                   |
| 391  | 6.5          | 0.0076                  | 0.9924    | Epiphytic | 45                 | 2       | 0.4775                                                                        | 0.2507                   |
| 392  | 13.9         | 0.0000                  | 1.0000    | Epiphytic | 135                | 6       | 0.3024                                                                        | 0.1878                   |
| 393  | 9.7          | 0.0000                  | 1.0000    | Epiphytic | 68                 | 3       | 0.3635                                                                        | 0.2049                   |
| 394  | 2.5          | 0.0000                  | 1.0000    | Epiphytic | 45                 | 2       | 1.2258                                                                        | 0.6435                   |
| 395  | 9.8          | 0.0000                  | 1.0000    | Epiphytic | 68                 | 3       | 0.3576                                                                        | 0.2015                   |
| 396  | 8.2          | 0.0000                  | 1.0000    | Epiphytic | 45                 | 2       | 0.3802                                                                        | 0.1996                   |

Node numbers correspond to those in Fig. 1 and Fig. S1. Best age estimates result from penalized likelihood analysis of our most likely phylogeny (incorporating 24 fossil age constraints; see Table S2). Proportional likelihoods for each habit are from our ancestral state reconstructions across the most likely tree—decisions were made using a threshold of 2 log-likelihood units. Estimated species totals are based strictly on our proportional sampling (see *Materials and Methods* in the main text), but should generally correspond to “actual” totals estimated from the literature (especially for well sampled clades; see Table 1). Estimated diversification rates were calculated both in the absence of extinction and under a high relative extinction rate, following Magallón and Sanderson [Magallón S, Sanderson MJ (2001) Absolute diversification rates in angiosperm clades. *Evolution* 55:1762–1780], using our best age estimates and the “estimated” total number of species in each clade.

**Table S4. Age, diversification rate, and other statistics for 32 key leptosporangiate nodes**

| Node | Name                              | Age (Ma) |             |             | Reconstructed habit     |           |             | Species   |        |         | Diversification rate, net speciation events per million years |        |                       |        |
|------|-----------------------------------|----------|-------------|-------------|-------------------------|-----------|-------------|-----------|--------|---------|---------------------------------------------------------------|--------|-----------------------|--------|
|      |                                   | Best     | 25–75%      | 0–100%      | Proportional likelihood |           |             | Total     |        |         | Extinction rate = 0.0                                         |        | Extinction rate = 0.9 |        |
|      |                                   |          |             |             | Terrestrial             | Epiphytic | Decision    | Estimated | Actual | Sampled | Estimated                                                     | Actual | Estimated             | Actual |
| 0    | Leptosporangiates                 | 299.0    | 299.0–299.0 | 299.0–299.0 | 0.9651                  | 0.0349    | Terrestrial | 9,000     | 9,000  | 400     | 0.0281                                                        | 0.0281 | 0.0226                | 0.0226 |
| 1    | Osmundaceous ferns (Osmundales)   | 199.6    | 199.6–199.6 | 199.6–199.6 | 0.9702                  | 0.0298    | Terrestrial | 68        | 20     | 3       | 0.0176                                                        | 0.0115 | 0.0099                | 0.0051 |
| 4    | Filmy ferns (Hymenophyllales)     | 185.1    | 190.4–174.7 | 209.5–158.5 | 0.1017                  | 0.8983    | Epiphytic   | 630       | 600    | 28      | 0.0311                                                        | 0.0308 | 0.0222                | 0.0219 |
| 5    | Trichomanoids                     | 147.3    | 152.0–141.0 | 165.6–125.8 | 0.0381                  | 0.9619    | Epiphytic   | 315       | 300    | 14      | 0.0344                                                        | 0.0340 | 0.0233                | 0.0229 |
| 18   | Hymenophylloids                   | 41.9     | 50.5–40.8   | 64.2–33.5   | 0.0001                  | 0.9999    | Epiphytic   | 315       | 300    | 14      | 0.1207                                                        | 0.1195 | 0.0817                | 0.0806 |
| 32   | Gleichenioids (Gleicheniales)     | 262.2    | 264.1–259.0 | 269.9–253.9 | 0.9872                  | 0.0128    | Terrestrial | 248       | 150    | 11      | 0.0184                                                        | 0.0165 | 0.0122                | 0.0104 |
| 43   | Schizaeoids (Schizaeales)         | 218.4    | 225.7–216.6 | 234.4–204.3 | 0.9909                  | 0.0091    | Terrestrial | 158       | 160    | 7       | 0.0200                                                        | 0.0201 | 0.0126                | 0.0127 |
| 49   | Core leptosporangiates            | 234.7    | 241.6–235.4 | 249.1–225.2 | 0.9988                  | 0.0012    | Terrestrial | 7,898     | 8,070  | 351     | 0.0353                                                        | 0.0354 | 0.0282                | 0.0283 |
| 50   | Heterosporous ferns (Salviniales) | 186.8    | 194.7–184.9 | 207.2–164.4 | 0.9943                  | 0.0057    | Terrestrial | 113       | 100    | 5       | 0.0216                                                        | 0.0209 | 0.0131                | 0.0125 |
| 55   | Tree ferns (Cyatheaales)          | 186.7    | 196.8–182.2 | 212.9–155.2 | 0.9997                  | 0.0003    | Terrestrial | 720       | 670    | 32      | 0.0315                                                        | 0.0311 | 0.0227                | 0.0223 |
| 65   | Scaly tree ferns                  | 93.5     | 93.5–93.5   | 112.7–32.5  | 0.9999                  | 0.0001    | Terrestrial | 495       | 600    | 22      | 0.0589                                                        | 0.0610 | 0.0414                | 0.0434 |
| 86   | Polypods (Polypodiiales)          | 191.0    | 200.5–192.6 | 207.2–179.1 | 0.9997                  | 0.0003    | Terrestrial | 7,065     | 7,300  | 314     | 0.0428                                                        | 0.0430 | 0.0341                | 0.0343 |
| 90   | Lindsaeoids                       | 47.0     | 52.9–46.3   | 62.6–42.4   | 0.9991                  | 0.0009    | Terrestrial | 113       | 190    | 5       | 0.0858                                                        | 0.0970 | 0.0521                | 0.0626 |
| 95   | Dennstaedtioids                   | 119.3    | 131.4–117.3 | 146.2–100.3 | 0.9994                  | 0.0006    | Terrestrial | 248       | 180    | 11      | 0.0404                                                        | 0.0377 | 0.0268                | 0.0242 |
| 106  | Pteroids                          | 110.8    | 121.1–112.4 | 144.6–101.6 | 0.9998                  | 0.0002    | Terrestrial | 1,193     | 1,000  | 53      | 0.0577                                                        | 0.0561 | 0.0427                | 0.0412 |
| 112  | Pteridioids                       | 56.2     | 63.9–57.4   | 77.3–49.6   | 1.0000                  | 0.0000    | Terrestrial | 405       | 350    | 18      | 0.0945                                                        | 0.0919 | 0.0653                | 0.0628 |
| 130  | Cheilantheoids                    | 81.2     | 88.3–79.3   | 100.4–69.6  | 0.9996                  | 0.0004    | Terrestrial | 338       | 350    | 15      | 0.0631                                                        | 0.0636 | 0.0430                | 0.0435 |
| 144  | Adiantoids                        | 80.3     | 86.4–79.2   | 107.6–72.4  | 0.9952                  | 0.0048    | Terrestrial | 338       | 280    | 15      | 0.0639                                                        | 0.0616 | 0.0435                | 0.0413 |
| 151  | Vittarioids                       | 45.7     | 49.2–44.7   | 67.5–39.1   | 0.0019                  | 0.9981    | Epiphytic   | 180       | 120    | 8       | 0.0985                                                        | 0.0896 | 0.0632                | 0.0548 |
| 158  | Eupolypods                        | 116.7    | 127.7–117.1 | 144.9–105.6 | 0.9975                  | 0.0025    | Terrestrial | 5,445     | 5,900  | 242     | 0.0678                                                        | 0.0685 | 0.0536                | 0.0543 |
| 159  | Eupolypods II                     | 103.1    | 114.4–103.3 | 126.5–96.8  | 0.9998                  | 0.0002    | Terrestrial | 2,070     | 2,600  | 92      | 0.0674                                                        | 0.0696 | 0.0513                | 0.0535 |
| 163  | Asplenioids                       | 57.7     | 63.7–58.0   | 71.2–51.0   | 0.9103                  | 0.0897    | Terrestrial | 653       | 700    | 29      | 0.1003                                                        | 0.1015 | 0.0717                | 0.0729 |
| 192  | Thelypteroids                     | 68.5     | 77.8–68.2   | 91.8–47.7   | 0.9999                  | 0.0001    | Terrestrial | 630       | 950    | 28      | 0.0840                                                        | 0.0900 | 0.0600                | 0.0659 |
| 221  | Blechnoids                        | 59.8     | 66.6–59.6   | 77.9–55.8   | 1.0000                  | 0.0000    | Terrestrial | 225       | 200    | 10      | 0.0789                                                        | 0.0770 | 0.0518                | 0.0499 |
| 230  | Athyrioids                        | 78.4     | 87.8–76.4   | 101.2–59.8  | 0.9999                  | 0.0001    | Terrestrial | 450       | 600    | 20      | 0.0691                                                        | 0.0727 | 0.0481                | 0.0518 |
| 249  | Eupolypods I                      | 98.9     | 111.5–100.8 | 127.9–88.2  | 0.9787                  | 0.0213    | Terrestrial | 3,375     | 3,300  | 150     | 0.0751                                                        | 0.0749 | 0.0584                | 0.0581 |
| 253  | Dryopteroids                      | 81.8     | 93.8–83.9   | 108.6–72.4  | 0.9999                  | 0.0001    | Terrestrial | 1,508     | 1,700  | 67      | 0.0810                                                        | 0.0824 | 0.0607                | 0.0622 |
| 295  | Elaphoglossoids                   | 32.7     | 38.0–33.0   | 44.6–28.6   | 0.0593                  | 0.9407    | Epiphytic   | 563       | 700    | 25      | 0.1724                                                        | 0.1791 | 0.1221                | 0.1287 |
| 327  | Tectarioids                       | 50.4     | 57.9–50.6   | 68.6–42.1   | 0.8710                  | 0.1290    | Ambiguous   | 203       | 200    | 9       | 0.0916                                                        | 0.0914 | 0.0595                | 0.0593 |
| 337  | Davallioids                       | 19.4     | 22.6–19.0   | 29.7–14.7   | 0.0000                  | 1.0000    | Epiphytic   | 90        | 65     | 4       | 0.1965                                                        | 0.1797 | 0.1157                | 0.1007 |
| 340  | Polygrammoids                     | 55.8     | 64.3–55.6   | 76.9–48.3   | 0.0001                  | 0.9999    | Epiphytic   | 1,328     | 1,200  | 59      | 0.1164                                                        | 0.1146 | 0.0868                | 0.0850 |
| 368  | Grammitids                        | 31.2     | 36.5–30.9   | 43.0–25.6   | 0.0000                  | 1.0000    | Epiphytic   | 675       | 600    | 30      | 0.1865                                                        | 0.1828 | 0.1337                | 0.1300 |

Node numbers correspond to those in Fig. 1 and Fig. S1, with node names following Schuettpelz and Pryer (1); the 7 extant leptosporangiate orders are indicated in parentheses. Best age estimates result from penalized likelihood analysis of our most likely phylogeny (incorporating 24 fossil age constraints; see Table S2); interquartile and complete age ranges summarize the results of penalized likelihood analyses of 100 bootstrap trees (note that some age ranges are very small because of the proximity of a fossil constraint). Proportional likelihoods for each habit are from our ancestral state reconstructions across the most likely tree—decisions were made using a threshold of 2 log-likelihood units. Estimated species totals are based strictly on our proportional sampling (see *Materials and Methods* in the main text); actual totals are also estimates, but from the literature [primarily from Smith et al. (2)]. Diversification rates were calculated both in the absence of extinction and under a high relative extinction rate [following Magallón and Sanderson (3)], using our best age estimates and the “estimated” and “actual” total number of species in each clade. Statistics for all nodes resolved in our most likely phylogeny (see Fig. S1) are reported in Table S3.

- Schuettpelz E, Pryer KM (2007) Fern phylogeny inferred from 400 leptosporangiate species and three plastid genes. *Taxon* 56:1037–1050.
- Smith AR, et al. (2006) A classification for extant ferns. *Taxon* 55:705–731.
- Magallón S, Sanderson MJ (2001) Absolute diversification rates in angiosperm clades. *Evolution* 55:1762–1780.



Table S5. Summary of tests for a constant rate of diversification

| Plot(s)     | Most likely timetree | Bootstrap timetrees |                  |
|-------------|----------------------|---------------------|------------------|
|             |                      | Constant (#)        | Not constant (#) |
| Total       | Not constant         | 9                   | 91               |
| Epiphytic   | Not constant         | 2                   | 98               |
| Ambiguous   | Constant             | 43                  | 57               |
| Terrestrial | Constant             | 81                  | 19               |

Rate constancy was assessed by fitting exponential curves to plots of divergences through time (see Fig. 2) drawn from our 101 dated phylogenies. Diversification rate was deemed "not constant" when an exponential distribution could be rejected ( $P < 0.05$ ; see *Materials and Methods* in the main text).

**Table S6. Summary of absolute diversification rates estimated for leptosporangiate fern nodes**

| Nodes              | N   | Diversification rate, net speciation events per million years |               |               |                       |               |               |
|--------------------|-----|---------------------------------------------------------------|---------------|---------------|-----------------------|---------------|---------------|
|                    |     | Extinction rate = 0.0                                         |               |               | Extinction rate = 0.9 |               |               |
|                    |     | Median                                                        | 25–75%        | 0–100%        | Median                | 25–75%        | 0–100%        |
| Overall            |     |                                                               |               |               |                       |               |               |
| Total              | 397 | 0.1355                                                        | 0.0733–0.2346 | 0.0167–1.6921 | 0.0802                | 0.0458–0.1430 | 0.0098–0.8883 |
| Epiphytic          | 134 | 0.1877                                                        | 0.1209–0.3295 | 0.0298–1.2258 | 0.1115                | 0.0733–0.1907 | 0.0181–0.6435 |
| Ambiguous          | 11  | 0.1019                                                        | 0.0736–0.1561 | 0.0277–0.2241 | 0.0643                | 0.0523–0.1103 | 0.0145–0.1360 |
| Terrestrial        | 252 | 0.1064                                                        | 0.0628–0.1853 | 0.0167–1.6921 | 0.0652                | 0.0397–0.1081 | 0.0098–0.8883 |
| Since K/T boundary |     |                                                               |               |               |                       |               |               |
| Total              | 308 | 0.1598                                                        | 0.1141–0.2908 | 0.0481–1.6921 | 0.0985                | 0.0670–0.1620 | 0.0252–0.8883 |
| Epiphytic          | 125 | 0.2007                                                        | 0.1353–0.3416 | 0.0486–1.2258 | 0.1157                | 0.0815–0.2032 | 0.0255–0.6435 |
| Ambiguous          | 7   | 0.1364                                                        | 0.0916–0.1590 | 0.0789–0.2241 | 0.0971                | 0.0595–0.1120 | 0.0523–0.1360 |
| Terrestrial        | 176 | 0.1506                                                        | 0.0979–0.2513 | 0.0481–1.6921 | 0.0900                | 0.0609–0.1510 | 0.0252–0.8883 |
| Since PETM         |     |                                                               |               |               |                       |               |               |
| Total              | 288 | 0.1702                                                        | 0.1242–0.3044 | 0.0589–1.6921 | 0.1026                | 0.0703–0.1688 | 0.0309–0.8883 |
| Epiphytic          | 120 | 0.2064                                                        | 0.1383–0.3559 | 0.0692–1.2258 | 0.1218                | 0.0825–0.2075 | 0.0363–0.6435 |
| Ambiguous          | 6   | 0.1462                                                        | 0.1147–0.1753 | 0.0916–0.2241 | 0.1037                | 0.0631–0.1180 | 0.0595–0.1360 |
| Terrestrial        | 162 | 0.1560                                                        | 0.1137–0.2684 | 0.0589–1.6921 | 0.0943                | 0.0655–0.1587 | 0.0309–0.8883 |

Summary statistics are based on diversification rates calculated for all nodes resolved in the most likely chronogram (see Fig. 1 and Fig. S1). Diversification rates were calculated both in the absence of extinction and under a high relative extinction rate, following Magallón and Sanderson [Magallón S, Sanderson MJ (2001) Absolute diversification rates in angiosperm clades. *Evolution* 55:1762–1780], using our best age estimates and the estimated number of species in each clade. Rates for each individual node are reported in Table S3.
